# Supplementary material for: Charge separation in a copper(i) donor–chromophore–acceptor assembly for both photoanode and photocathode sensitization
Source: Royal Society of Chemistry journal article supplement (doi:10.1039/d4dt01681e), 2024-01-01
Supplement: d4dt01681e1.pdf [file d4dt01681e1.pdf]

Supplementary Information for:

## Charge Separation in a Copper(I) Donor-Chromophore-Acceptor Assembly for both Photoanode and Photocathode Sensitization

*Zujhar Singh<sup>1</sup>, Joseph D. Chiong<sup>1</sup>, Joseph Ricardo-Noordberg<sup>1</sup>, Saeid Kamal<sup>2</sup>, Marek B. Majewski<sup>1\*</sup>*

1. Department of Chemistry and Biochemistry and Centre for NanoScience Research  
Concordia University, 7141 Sherbrooke Street West, Montreal, Quebec, H4B 1R6, Canada

2. Department of Chemistry and Laboratory for Advanced Spectroscopy and Imaging Research  
(LASIR), The University of British Columbia, 2036 Main Mall, Vancouver, British Columbia V6T  
1Z1, Canada

E-mail: [marek.majewski@concordia.ca](mailto:marek.majewski@concordia.ca)

## Table of Contents

|                                                                          |     |
|--------------------------------------------------------------------------|-----|
| Experimental Methods .....                                               | S3  |
| <i>General Procedures.</i> .....                                         | S3  |
| <i>Synthesis of Donor (D).</i> .....                                     | S4  |
| <i>Synthesis of Acceptor (A).</i> .....                                  | S9  |
| <i>Synthesis of Copper Complexes.</i> .....                              | S10 |
| NMR Analysis .....                                                       | S12 |
| HR-ESI Mass Spectrum of D-Cu(I)-A.....                                   | S20 |
| Photoluminescence Characterization of the Triad and Dyad Complexes ..... | S21 |
| DFT Representation of the Triad and Dyad Complexes .....                 | S22 |
| Spectroelectrochemical Analysis of D-Cu(I)-A.....                        | S24 |
| Spectroelectrochemical Analysis of Acceptor .....                        | S24 |
| Femtosecond Transient Absorption Spectroscopy Analysis of D-Cu(I).....   | S25 |
| Nanosecond Transient Absorption Spectroscopy Analysis. ....              | S26 |
| DFT Calculations .....                                                   | S32 |
| ZnO A-Cu(I)-D photoanode loading.....                                    | S30 |
| FNiO D-Cu(I)-A photocathode loading .....                                | S31 |
| References.....                                                          | S49 |

## Experimental Methods

### *General Procedures.*

DFT calculations were carried out with Gaussian 16<sup>1</sup> using the B3PW91 functional<sup>2</sup> with LANL2DZ as basis set.<sup>3</sup> The optimizations were conducted without symmetry constraint, and frequency calculations were made to confirm reaching the energy minima. GaussView<sup>5</sup><sup>4</sup> and IQmol were used for data analysis, visualization and plots. All calculations were conducted for gas phase complexes.

All photoluminescence data were collected using a Horiba PTI QuantaMaster 8075 Spectrofluorometer. Emission data were collected at excitation wavelengths of 340 and 460 nm with an integration time of 1 s, step size of 1 nm, and slits of 2 nm (for 340 nm) and 5 nm, (for 460 nm) with an automatic 5 s dark background collection and were measured in a 1 cm pathlength quartz cuvette in CH<sub>2</sub>Cl<sub>2</sub>. Excitation data were collected under identical conditions, unless otherwise stated, with an emission wavelengths of 540 nm and 690 nm and slit widths of 3 nm. All data reported are corrected to account for fluctuations in lamp intensity and detector sensitivity.

*Synthesis of Donor (D).* Donor (D) was synthesized using reaction Scheme 1. Dimethyl 4,4'-azanediyl-dibenzoate (3) was synthesized using a Buchwald-Hartwig coupling between methyl-4-bromobenzoate (1) and methyl-4-aminobenzoate (2) in 76 % yield, which after another coupling with 4-bromobenzaldehyde under similar conditions yielded dimethyl 4,4'-(4-formylphenyl)azanediyl)-dibenzoate (4) in fair yields. Separately, the synthesis of 2,9-dimesityl-1,10-phenanthroline-5,6-dione (5) was done using modifications of the previous reported procedures.<sup>5, 6</sup> Synthesis of dimethyl 4,4'-((4-(6,9-dimesityl-1H-imidazo[4,5-f][1,10]phenanthroline-2-yl)phenyl)azanediyl)-dibenzoate (6) was carried out using a modification of a previously reported procedure through the condensation of 5 with 4.<sup>7</sup> Finally, donor (D) was synthesized by alkylating the imidazole nitrogen in 6 using reported methods in 90 % yield.<sup>7</sup> Identities of all known compounds were confirmed by comparison of basic characterization data to previous reports.

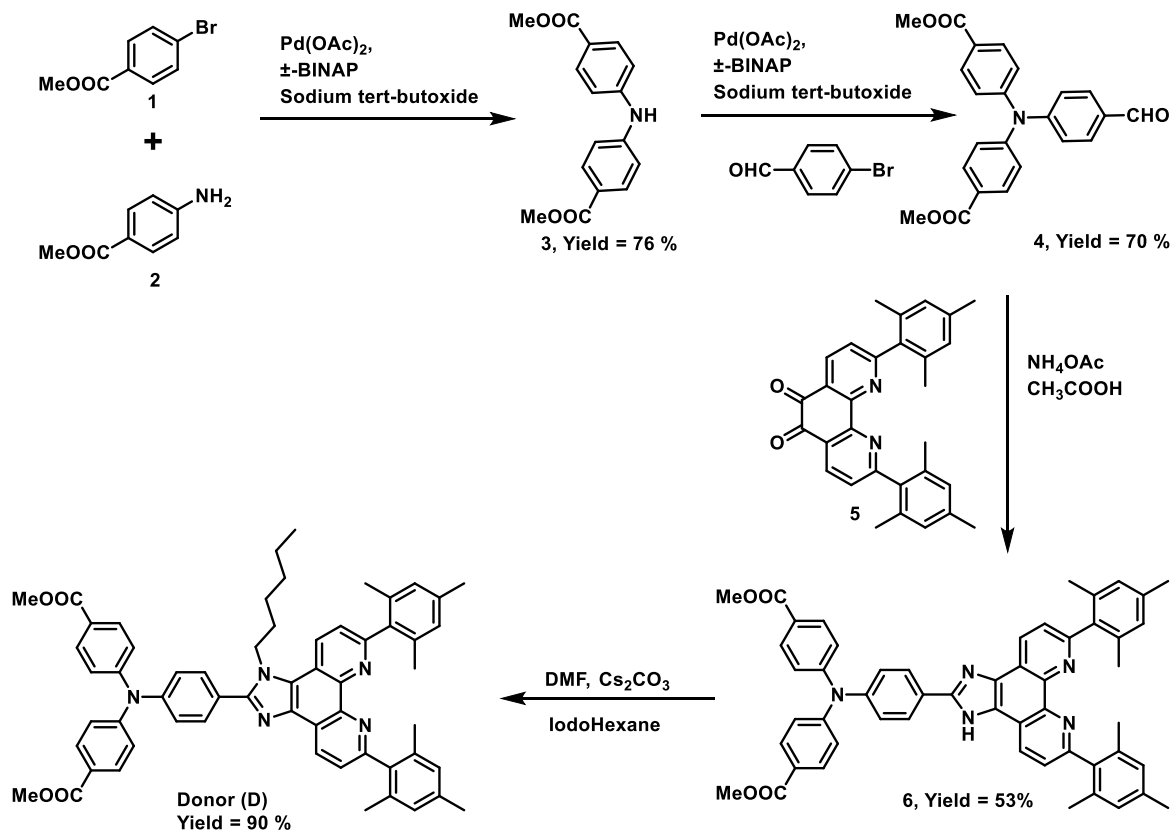

Scheme S1: Synthesis steps for the donor (D).

*Synthesis of dimethyl 4,4'-azanediyl-dibenzoate (3).* Methyl-4-bromobenzoate (550 mg, 2.33 mmol) and methyl-4-aminobenzoate (354 mg, 2.33 mmol) were dissolved in 40 mL toluene: water (9:1) in a 100 mL three-neck round bottom flask fitted with a condenser under nitrogen atmosphere. Potassium *t*-butoxide (1.1 g, 9.2 mmol) was also added to the flask and the mixture was deaerated by bubbling nitrogen for 15 minutes while stirring. To this mixture palladium acetate (51.6 mg, 0.23 mmol) and  $\pm$ -BINAP (186.6 mg, 0.3 mmol) were added, and the resulting solution was heated to 100 °C for 16 hours. Then, the reaction flask was cooled to room temperature, and the solvents were rotary-evaporated. The resulting crude black solid was dissolved in dichloromethane and washed with water (3 $\times$ ). The organic layers were concentrated and loaded onto a silica column for purification using a 1:1 v/v ethyl acetate:hexane solvent mixture. The final product **3** (465 mg, 1.63 mmol) was obtained in 76 % yield. <sup>1</sup>H NMR (300 MHz, CDCl<sub>3</sub>)  $\delta$  7.98 (d, *J* = 8.8 Hz, 4H), 7.13 (d, *J* = 8.8 Hz, 4H), 3.90 (s, 6H) ppm. <sup>13</sup>C NMR (126 MHz, CDCl<sub>3</sub>)  $\delta$  166.70, 145.80, 131.45, 123.10, 116.89, 51.90 ppm. HR-MS (ESI<sup>+</sup>): *m/z* = 286.1073, calculated for [C<sub>16</sub>H<sub>16</sub>NO<sub>4</sub>]<sup>+</sup> *m/z* = 286.1074.

*Synthesis of dimethyl 4,4'-(4-formylphenyl)azanediyl-dibenzoate (4).* As in the procedure described for the synthesis of **3**, a Buchwald-Hartwig coupling of **3** (400 mg, 1.40 mmol) and 4-bromobenzaldehyde (260 mg, 1.40 mmol) yielded the aldehyde product **4** (381 mg, 0.98 mmol) in 70 % yield after purification by silica column chromatography using 1 % v/v methanol in dichloromethane as eluting solvent. <sup>1</sup>H NMR (300 MHz, CDCl<sub>3</sub>)  $\delta$  9.91 (s, 1H), 7.98 (d, *J* = 6.9 Hz, 4H), 7.77 (d, 6.7 Hz, 2H), 7.15 (m, 6H), 3.91 (s, 6H) ppm. <sup>13</sup>C NMR (126 MHz, CDCl<sub>3</sub>)  $\delta$  190.37, 166.21, 151.61, 149.93, 131.19, 125.94, 123.22, 122.86, 116.73, 51.74 ppm. HR-MS (ESI<sup>+</sup>): *m/z* = 390.1344, calculated for [C<sub>23</sub>H<sub>20</sub>NO<sub>5</sub>]<sup>+</sup> *m/z* = 390.1336.

*Synthesis of dimethyl 4,4'-((4-(6,9-dimesityl-1H-imidazo[4,5-f][1,10]phenanthroline-2-yl)phenyl)azanediyl)-dibenzoate (6).* Synthesis of donor **6** was carried out using a modification of a previously reported procedure (Scheme S1) through the condensation of 2,9-dimesityl-1,10-phenanthroline-5,6-dione **5** with aldehyde **4**. In a representative procedure, **4** (100 mg, 0.26 mmol), **5** (115 mg, 0.26 mmol), and ammonium acetate (320 mg, 4.2 mmol) were dissolved in 10 mL of acetic acid in a two-neck flask fitted with a condenser under nitrogen. The dark red mixture was refluxed for 24 hours, cooled down to room temperature and the solvent was evaporated using a rotary evaporator. The black slurry obtained was then taken up in dichloromethane and washed twice sequentially with aqueous saturated sodium bicarbonate and brine. The organic layer was collected, concentrated by rotary evaporation and purified using column chromatography on silica with CH<sub>2</sub>Cl<sub>2</sub>:MeOH (99:2 v/v) as the mobile phase to give **D** (116 mg, 0.14 mmol) in 55 % yield as a yellow powder. <sup>1</sup>H NMR (300 MHz, DMSO-*d*<sub>6</sub>) δ 13.84 (s, 1H), 9.01 (d, *J* = 8.3 Hz, 2H), 8.39 – 8.30 (m, 2H), 8.01 – 7.90 (4, 2H), 7.77 (m, 2H), 7.40 (d, *J* = 8.5 Hz, 2H), 7.28 – 7.17 (m, 4H), 6.98 (s, 4H), 3.85 (s, 6H), 2.30 (s, 6H), 2.01 (s, 12H) ppm. <sup>13</sup>C NMR (75 MHz, DMSO) δ 166.16, 157.45, 150.77, 147.06, 137.19, 135.78, 131.49, 128.61, 128.46, 127.19, 126.63, 124.55, 123.41, 21.21, 20.53 ppm. HR-MS (ESI<sup>+</sup>): *m/z* = 816.3536, calculated for [C<sub>53</sub>H<sub>46</sub>N<sub>5</sub>O<sub>4</sub>]<sup>+</sup> *m/z* = 816.3544.

*Synthesis of Donor (D).* **6** (100 mg, 0.12 mmol) and Cs<sub>2</sub>CO<sub>3</sub> (325 mg, 1.00 mmol) were dissolved in 10 mL of dry DMF under nitrogen. The yellow mixture was heated at 100 °C for 30 minutes, where the colour of the mixture turned to green. *N*-Hexyl iodide (0.1 mL) was injected into the flask and the mixture was further stirred at 100 °C for 4 hours and then allowed to cool to room temperature. The solvents were removed by rotary evaporation and the crude product was purified by column chromatography on silica (CH<sub>2</sub>Cl<sub>2</sub>:CH<sub>3</sub>OH 99:1 v/v) to give donor **D** (99 mg, 90%).

$^1\text{H}$  NMR (300 MHz, DMSO-*d*6)  $\delta$  8.93 (dd,  $J = 19.7, 8.6$  Hz, 2H), 7.96 (d,  $J = 8.8$  Hz, 4H), 7.90 – 7.67 (m, 2H), 7.39 (d,  $J = 8.6$  Hz, 2H), 7.23 (d,  $J = 6.7$  Hz, 4H), 6.99 (s, 4H), 4.80 (s, 2H), 3.85 (s, 6H), 2.30 (s, 6H), 2.03 (d,  $J = 9.2$  Hz, 12H), 1.12 (m, 10H), 0.75 (m, 3H) ppm.  $^{13}\text{C}$  NMR (126 MHz, dmso)  $\delta$  166.13, 157.98, 156.90, 153.52, 150.76, 147.17, 138.49, 138.08, 137.31, 136.42, 135.83, 135.74, 131.99, 131.47, 128.68, 128.62, 126.20, 125.33, 124.66, 123.49, 122.28, 118.52, 52.46, 30.59, 29.73, 25.42, 21.20, 20.53, 20.48, 14.12 ppm. HR-MS (ESI+):  $m/z = 900.4480$ , calculated for  $[\text{C}_{59}\text{H}_{57}\text{N}_5\text{O}_4]^+$   $m/z = 900.4483$ .



*Synthesis of Acceptor (A).* The detailed synthesis of A is described in our previous work<sup>8</sup> and starts from the nitration of 2,9-dimethylphenanthroline (7) to 5-nitro-2,9-dimethylphenanthroline (8) in 38 % yield. Further, this nitro derivative was reduced using 5 % Pd/C in presence of hydrazine monohydrate to form 5-amino-2,9-dimethylphenanthroline in 90 % yield. Finally, this amino derivative was coupled with 4-bromonaphthalene-1,8-dicarboxyanhydride derivative to form acceptor ligand A in 72 % yield (Scheme S2).

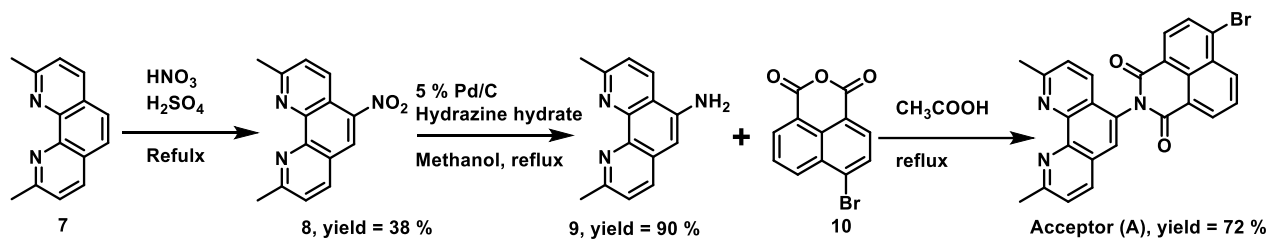

Scheme S2: Synthesis of Acceptor A.

Synthesis of Copper Complexes.

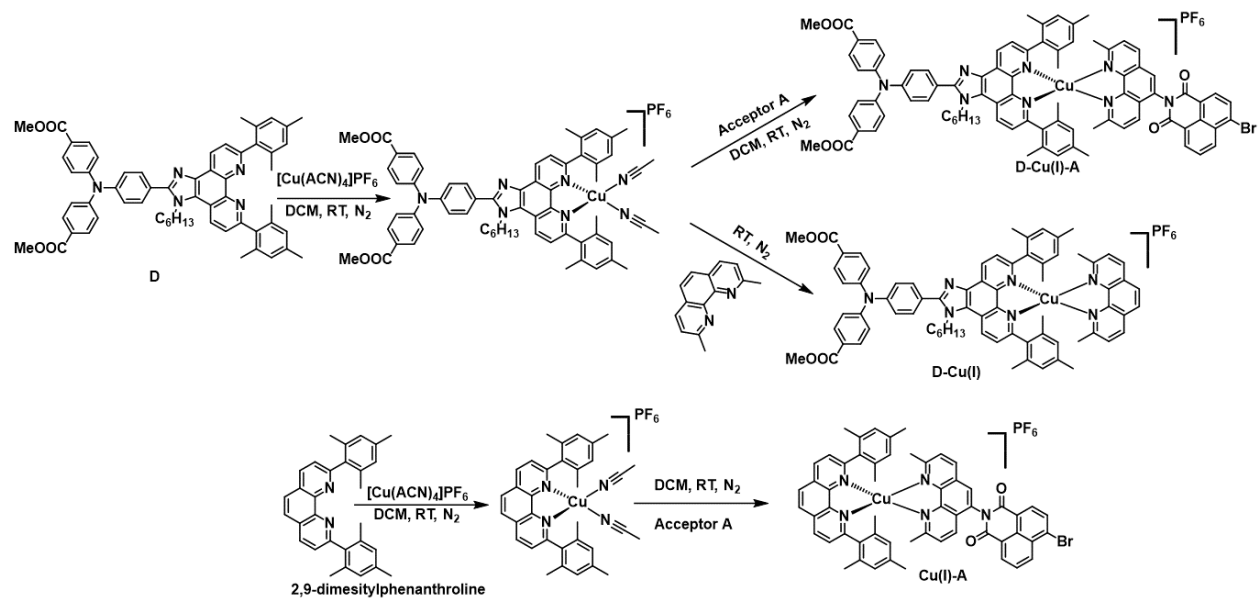

Scheme S3. Synthetic approach for synthesis of **D-Cu(I)-A**, **D-Cu(I)** and **Cu(I)-A**.

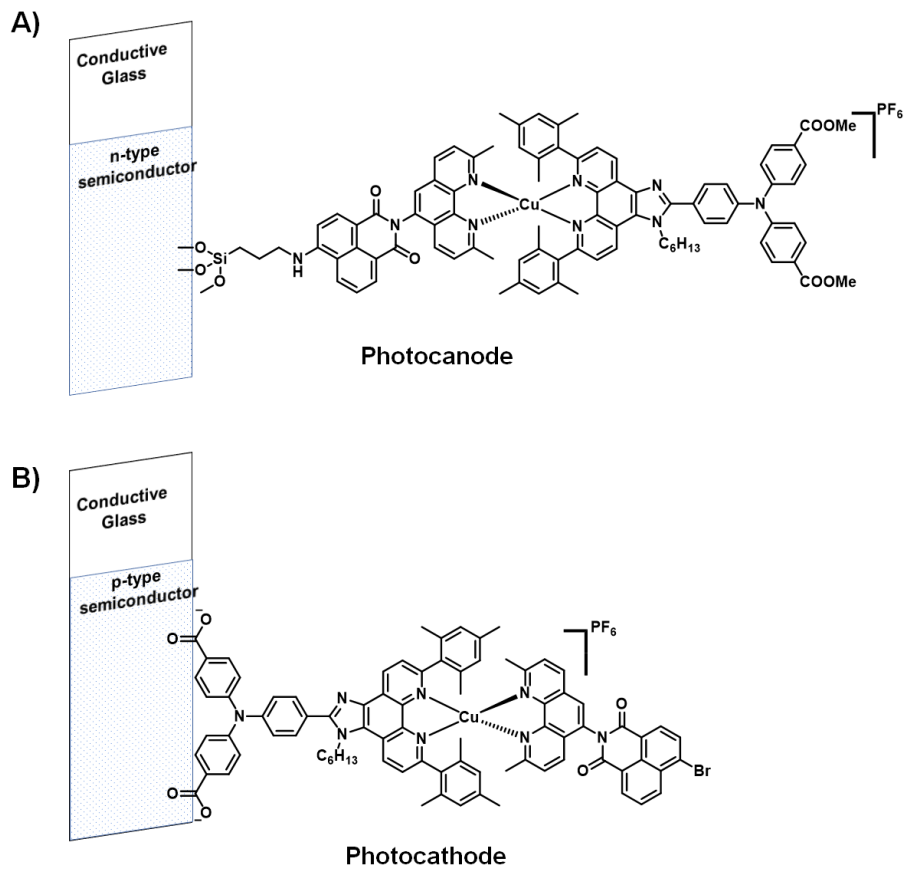

Figure S1. A) Mode of anchoring of **D-Cu(I)-A** to construct a photoanode. B) Mode of anchoring of **D-Cu(I)-A** to construct a photocathode.

## NMR Analysis

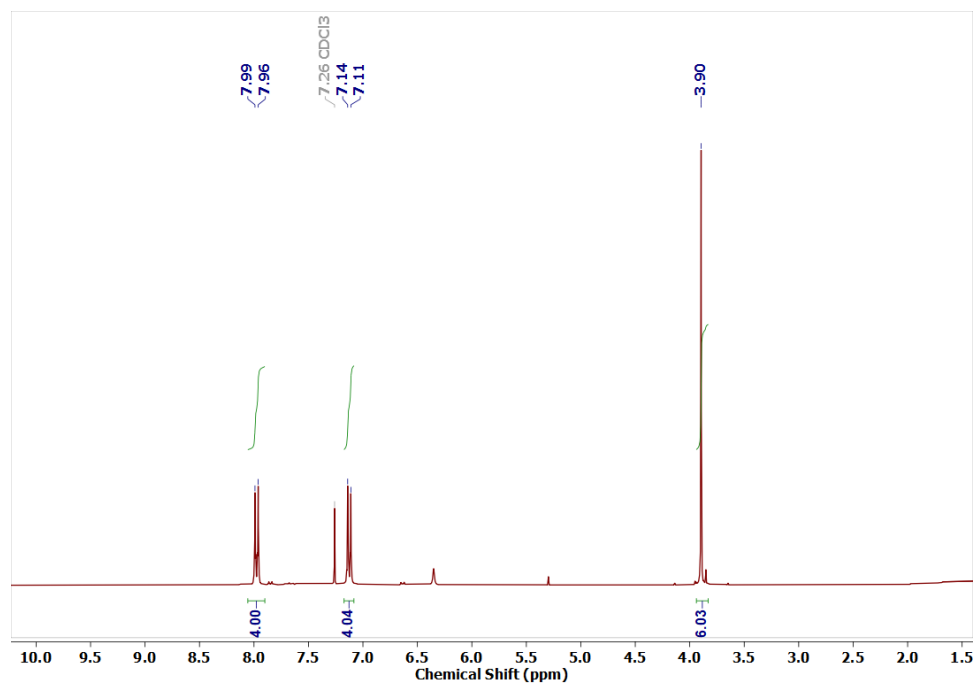

Figure S2. <sup>1</sup>H NMR of the compound **3** in CDCl<sub>3</sub>.

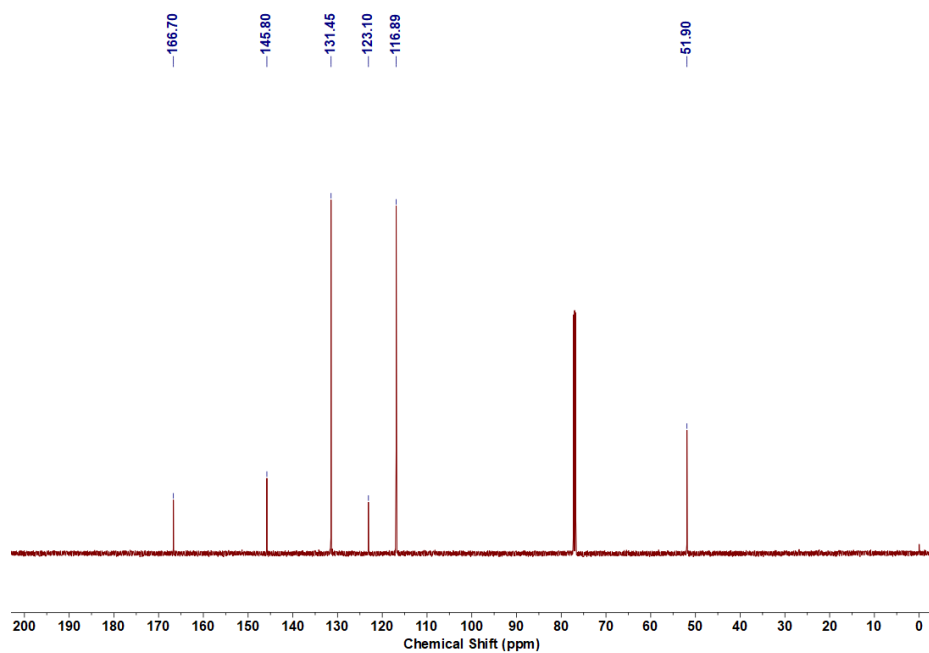

Figure S3. <sup>13</sup>C NMR of the compound **3** in CDCl<sub>3</sub>.

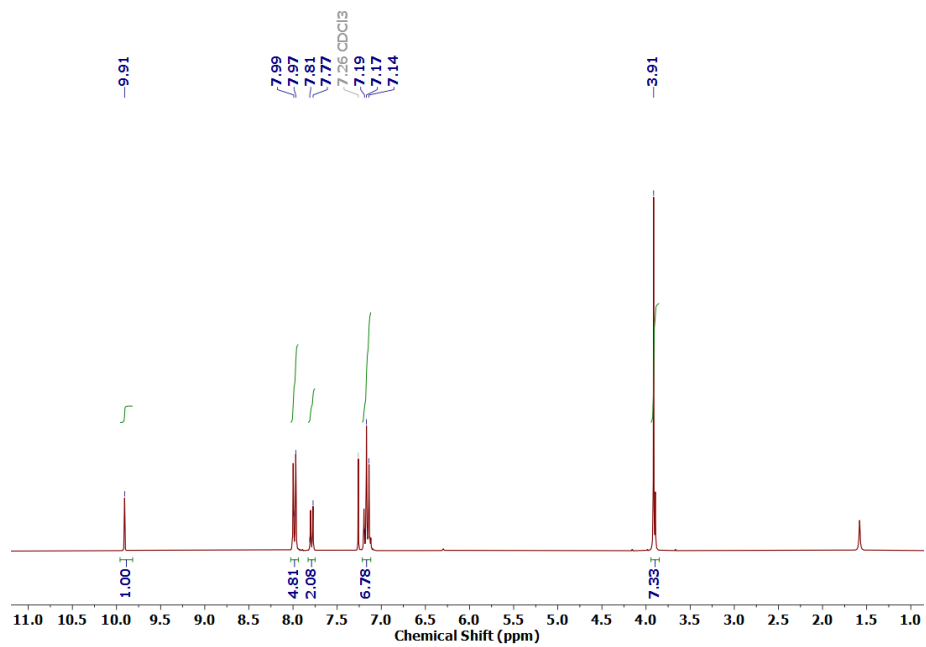

Figure S4. <sup>1</sup>H NMR of the compound **4** in CDCl<sub>3</sub>.

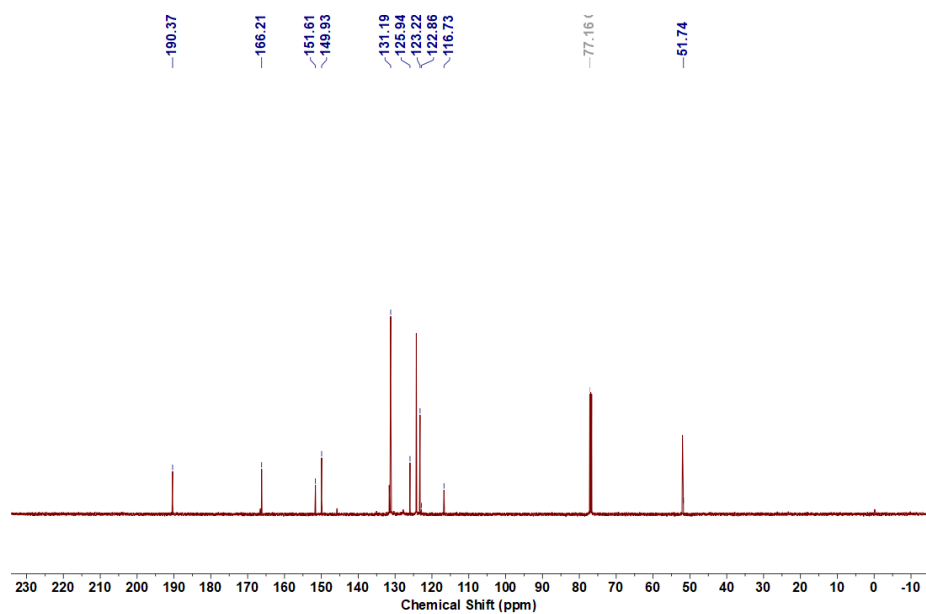

Figure S5. <sup>13</sup>C NMR of the compound **4** in CDCl<sub>3</sub>.

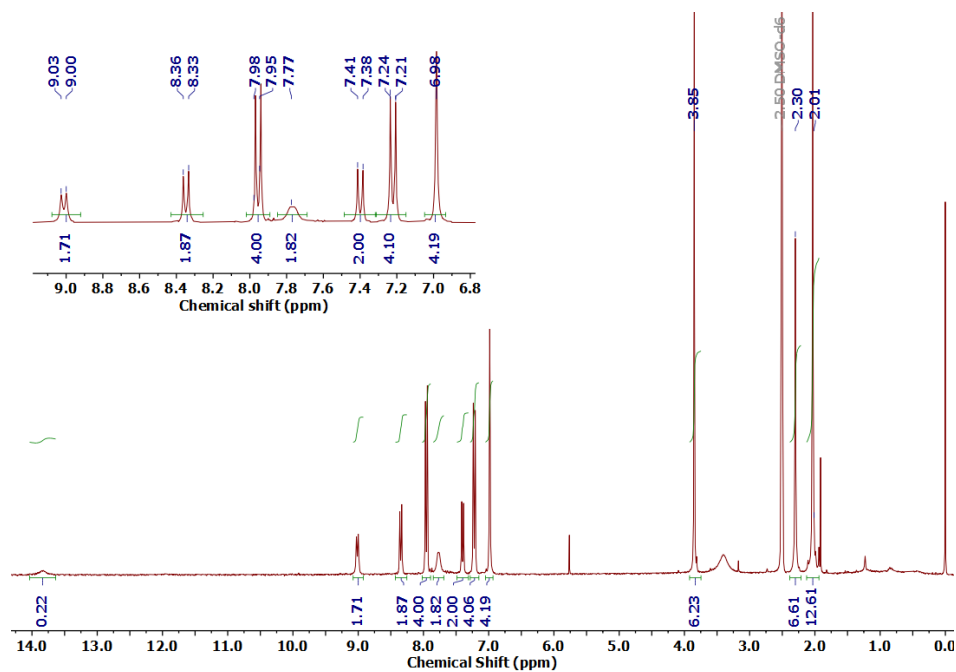

Figure S6.  $^1\text{H}$  NMR of the compound **5** in  $\text{DMSO-}d_6$ .

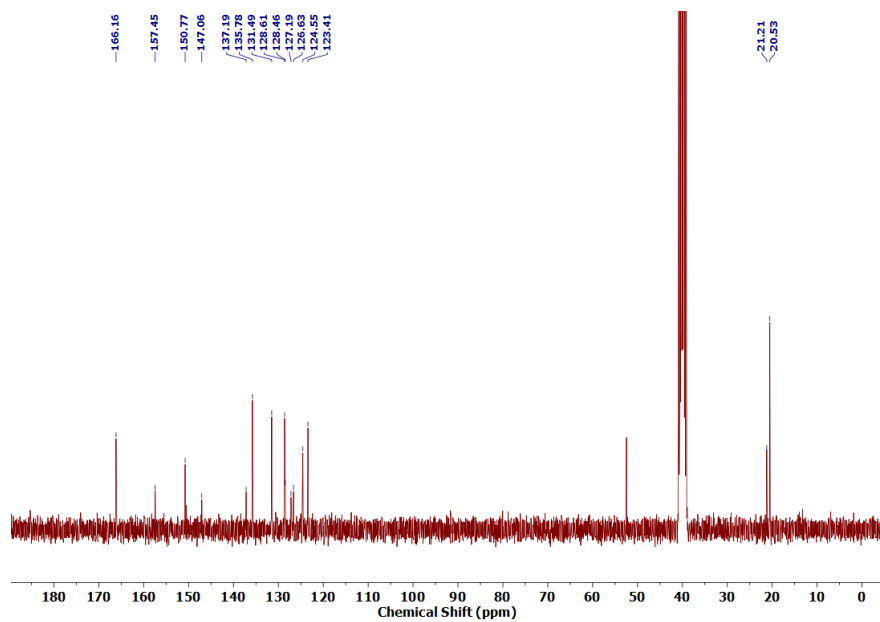

Figure S7.  $^{13}\text{C}$  NMR of the compound **5** in  $\text{DMSO-}d_6$ .

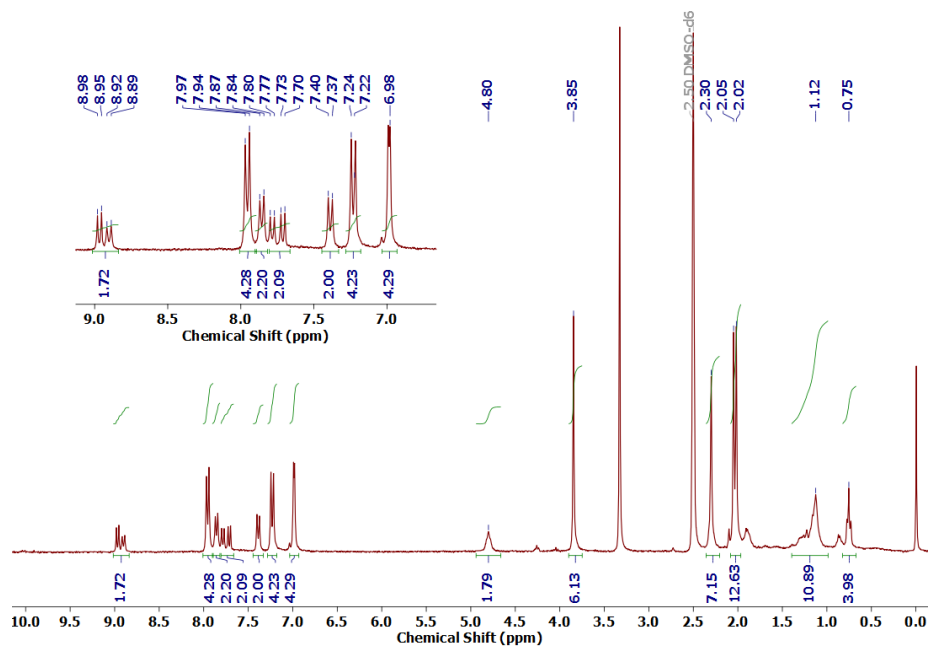

Figure S8.  $^1\text{H}$  NMR of the donor ligand **D** in  $\text{DMSO-}d_6$ .

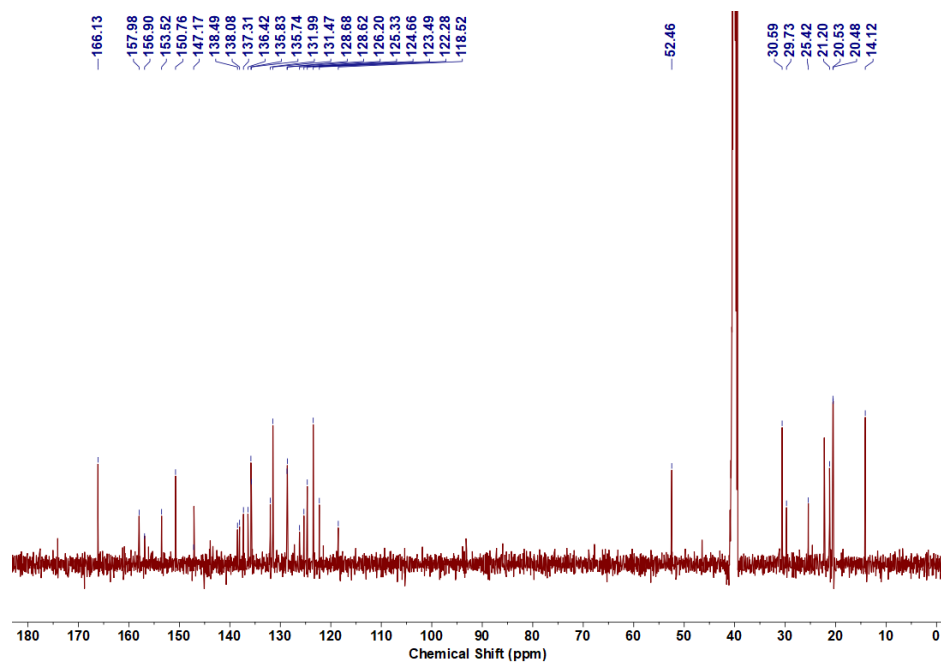

Figure S9.  $^{13}\text{C}$  NMR of the donor ligand **D** in  $\text{DMSO-}d_6$ .

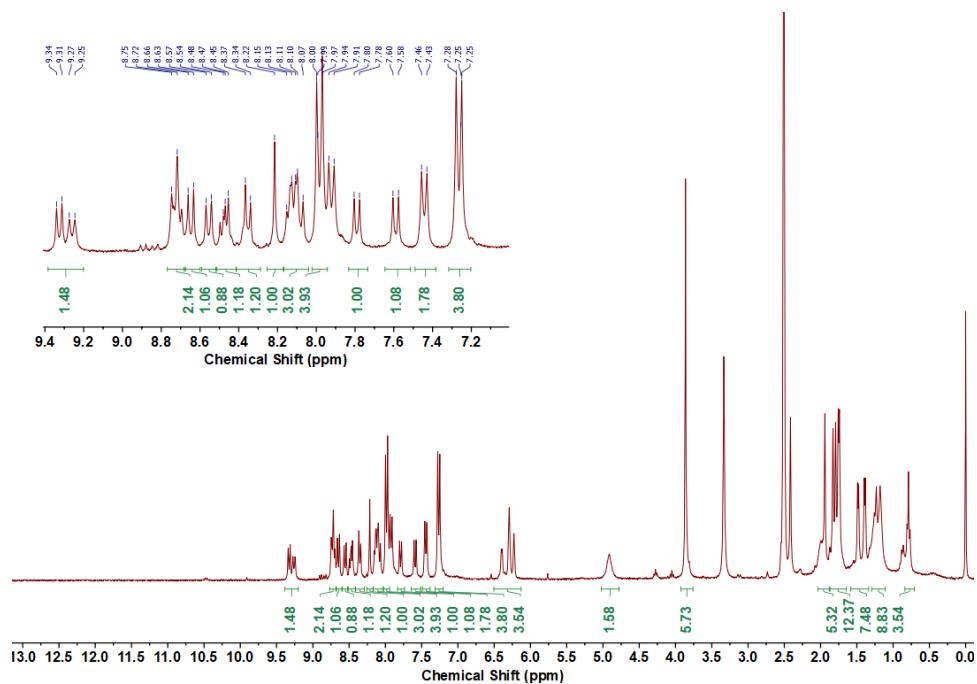

Figure S10.  $^1\text{H}$  NMR of the triad **D-Cu(I)-A** in  $\text{DMSO-}d_6$ .

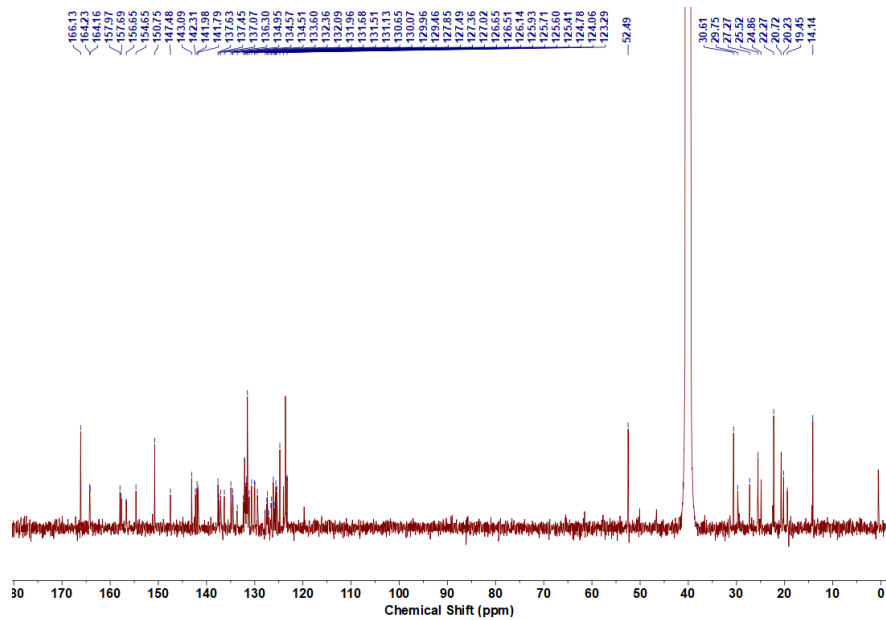

Figure S11.  $^{13}\text{C}$  NMR of the triad **D-Cu(I)-A** in  $\text{DMSO-}d_6$ .



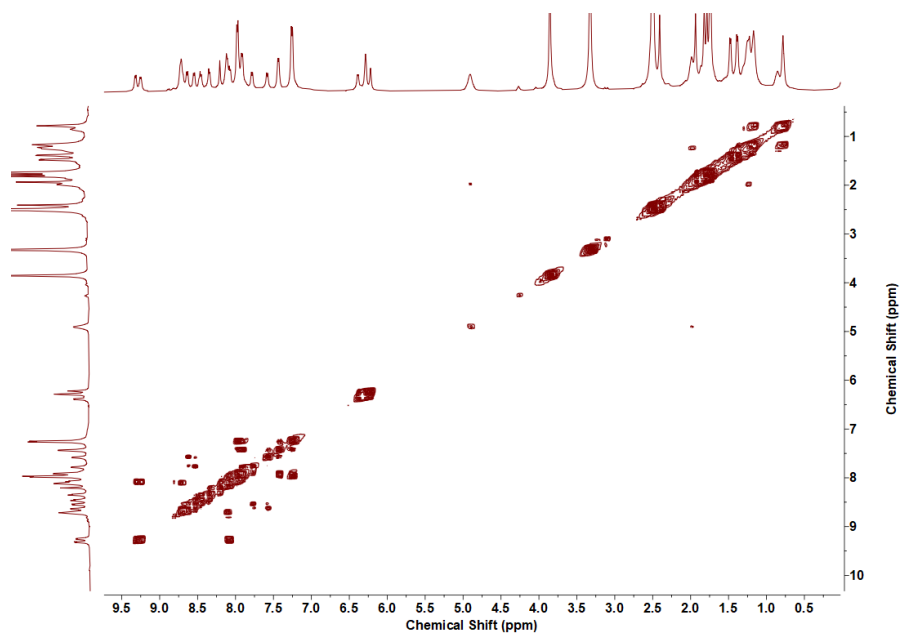

Figure S12. Full  $^1\text{H}$  gCOSY NMR of the triad **D-Cu(I)-A** in  $\text{DMSO-}d_6$ .

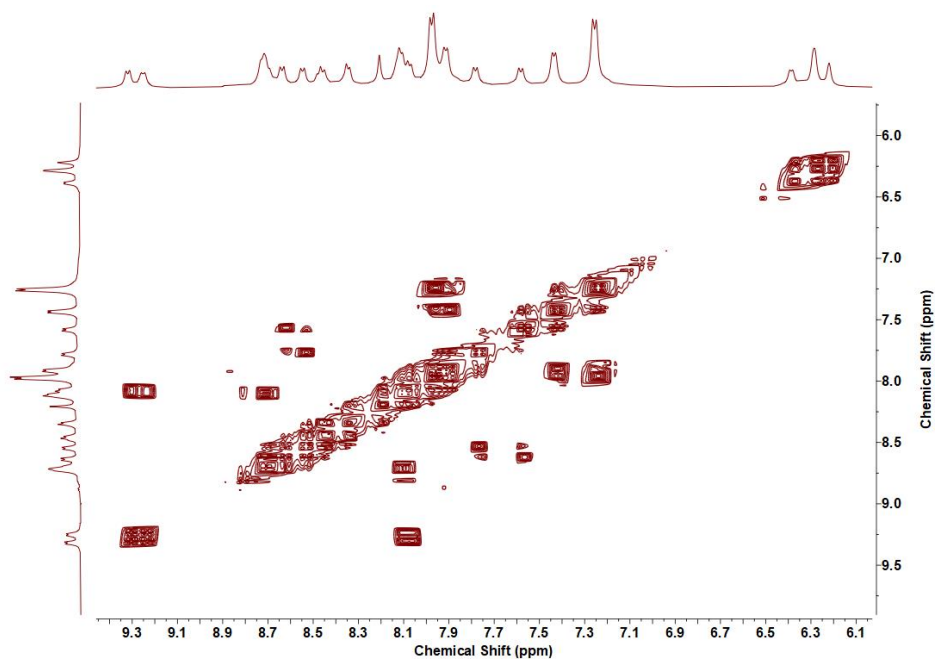

Figure S13.  $^1\text{H}$  gCOSY NMR of the triad **D-Cu(I)-A** in  $\text{DMSO-}d_6$  of the aromatic region.

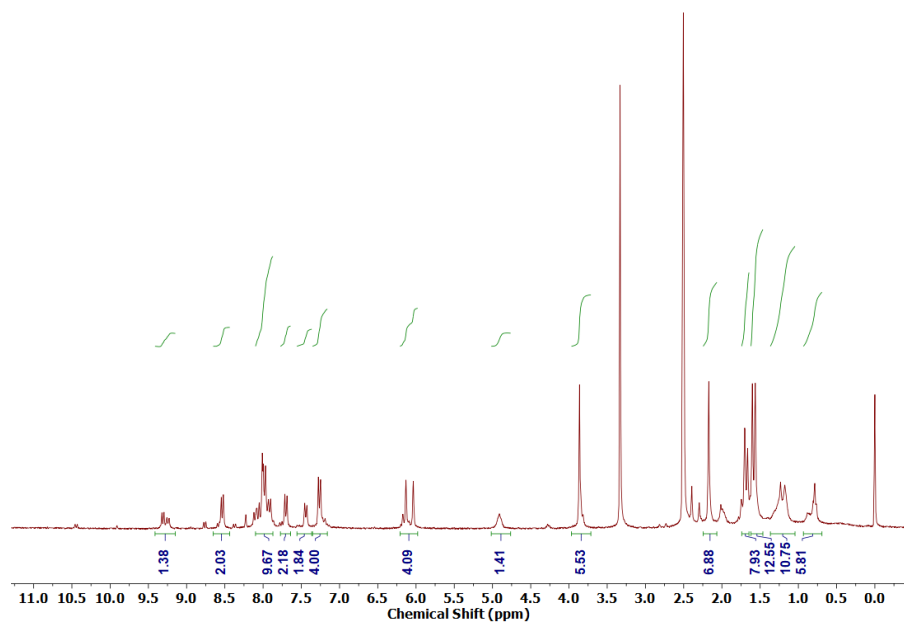

Figure S14.  $^1\text{H}$  NMR of the dyad **D-Cu(I)** in  $\text{DMSO-}d_6$ .

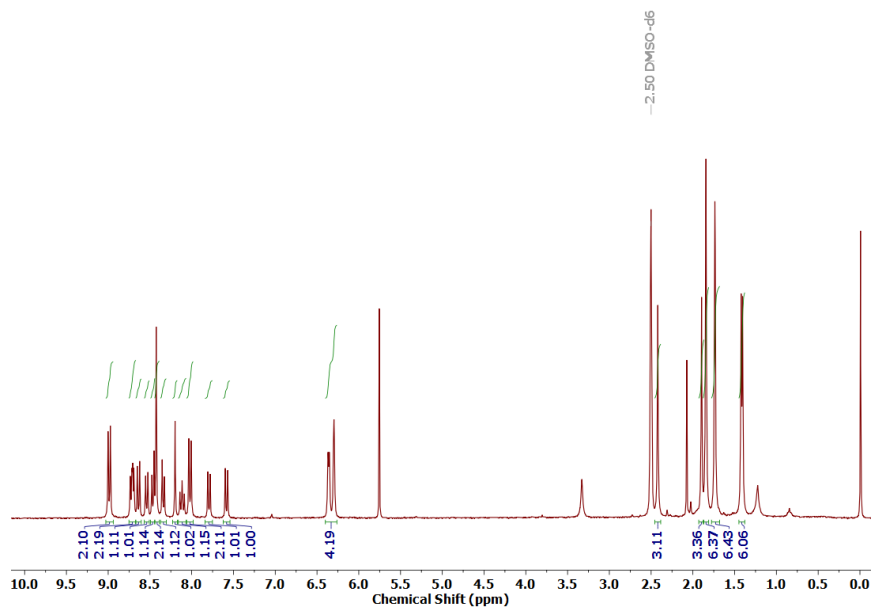

Figure S15.  $^1\text{H}$  NMR of the dyad **Cu(I)-A** in  $\text{DMSO-}d_6$ .

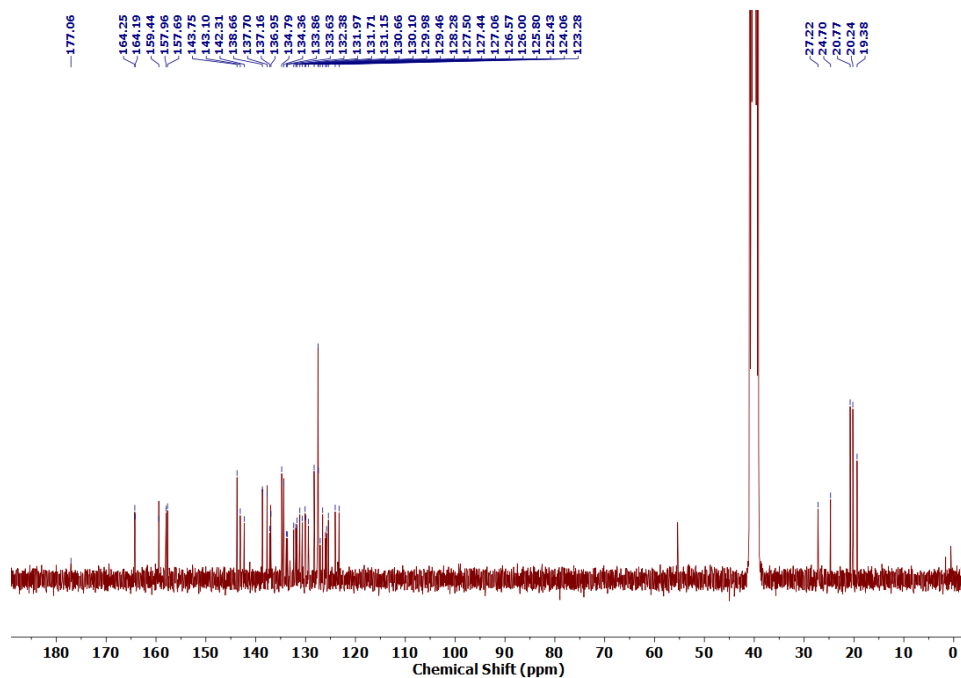

Figure S16.  $^{13}\text{C}$  NMR of the dyad **Cu(I)-A** in  $\text{DMSO-}d_6$ .

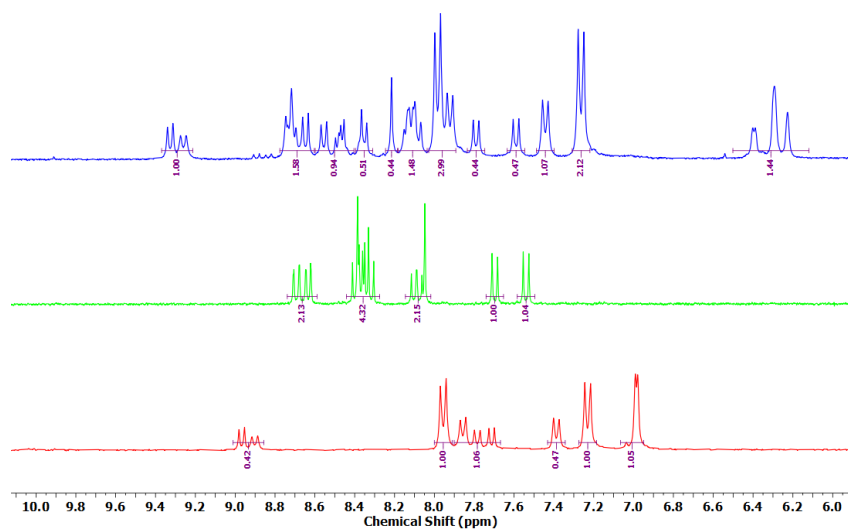

Figure S17. Overlaid  $^1\text{H}$  NMR of the aromatic region for the donor ligand **D** (red), acceptor ligand **A** (green) and triad **D-Cu(I)-A** in  $\text{DMSO-}d_6$ .

# HR-ESI Mass Spectrum of D-Cu(I)-A

D:\CBAM\SL\_20221024\_Zqhar\_Pos\_Sample5

24/10/2022 11:57:42 AM

20221024\_Zqhar\_Pos\_Sample5 #2-10 RT: 0.01-0.23 AV: 9 NL: 2.22E7  
T: FTMS + p ESI Full ms [200.00-1600.00]

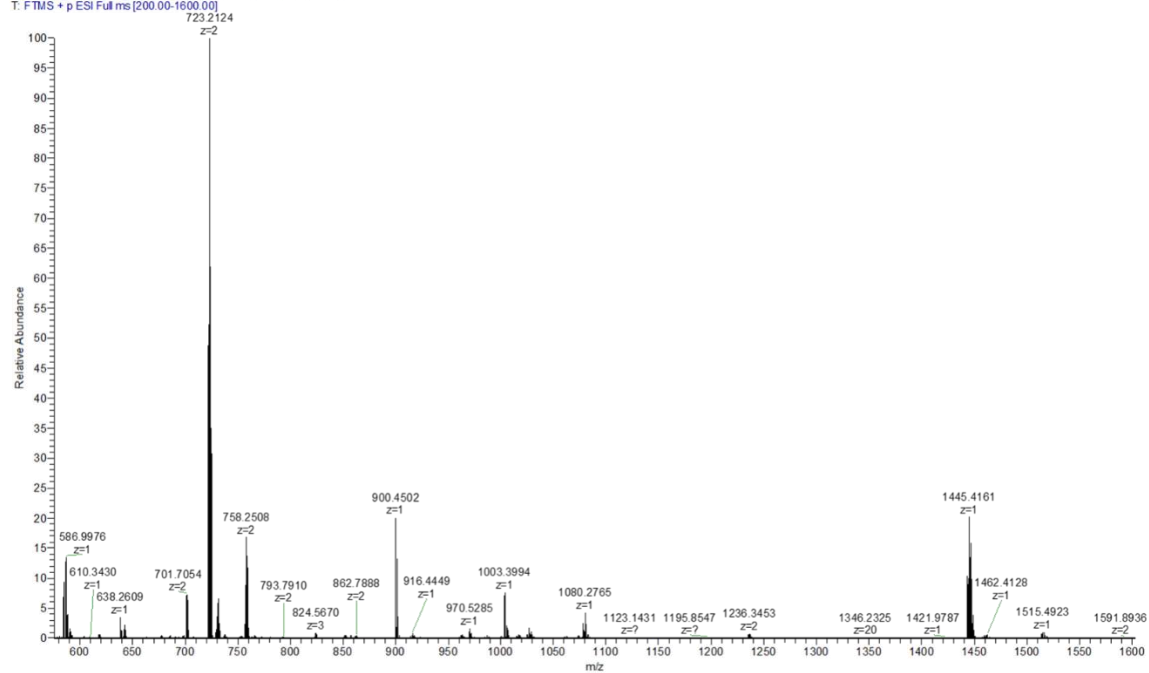

Figure S18. HR-ESI mass spectrum of D-Cu(I)-A.

## Photoluminescence Characterization of the Triad and Dyad Complexes

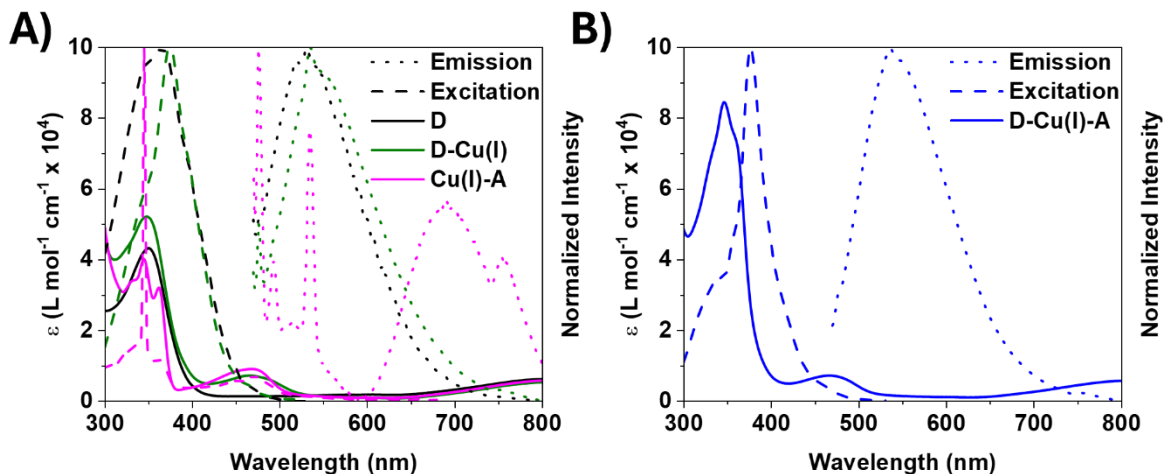

Figure S19. Absorbance (solid lines), emission (dotted lines,  $\lambda_{\text{ex}} = 460$  nm) and excitation (dashed lines) for A) **D** (black traces,  $\lambda_{\text{em}} = 540$  nm), and **Cu(I)-A** (pink traces,  $\lambda_{\text{em}} = 690$  nm) and **D-Cu(I)** (green traces,  $\lambda_{\text{em}} = 540$  nm) dyads in  $\text{CH}_2\text{Cl}_2$  at room temperature, and B) **D-Cu(I)-A** (blue traces,  $\lambda_{\text{em}} = 540$  nm) triad. All data collected in  $\text{CH}_2\text{Cl}_2$  at room temperature. Emission scans with  $\lambda_{\text{ex}} = 460$  nm were collected with 2 nm slit widths, excitation scans taken with  $\lambda_{\text{em}} = 540$  nm and 690 nm emission were collected with 3 nm slit widths.

## DFT Representation of the Triad and Dyad Complexes

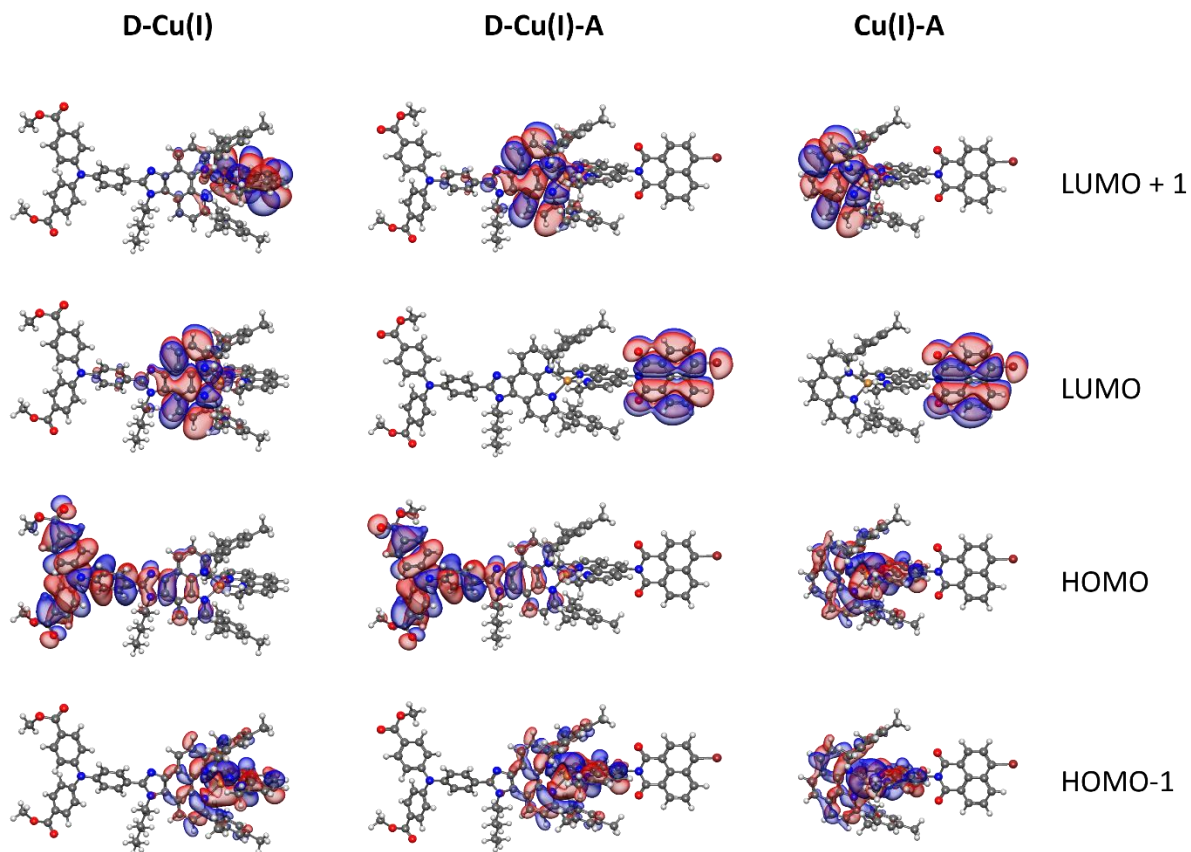

Figure S20. Graphical representation of the frontier orbitals of **D-Cu(I)**, **D-C(I)-A** and **Cu(I)-A** drawn at an isovalue of  $0.0200 \text{ \AA}^{-3}$  as calculated using Gaussian 16<sup>1</sup> using the B3PW91 functional<sup>2</sup> with LANL2DZ as the basis set.<sup>3</sup>

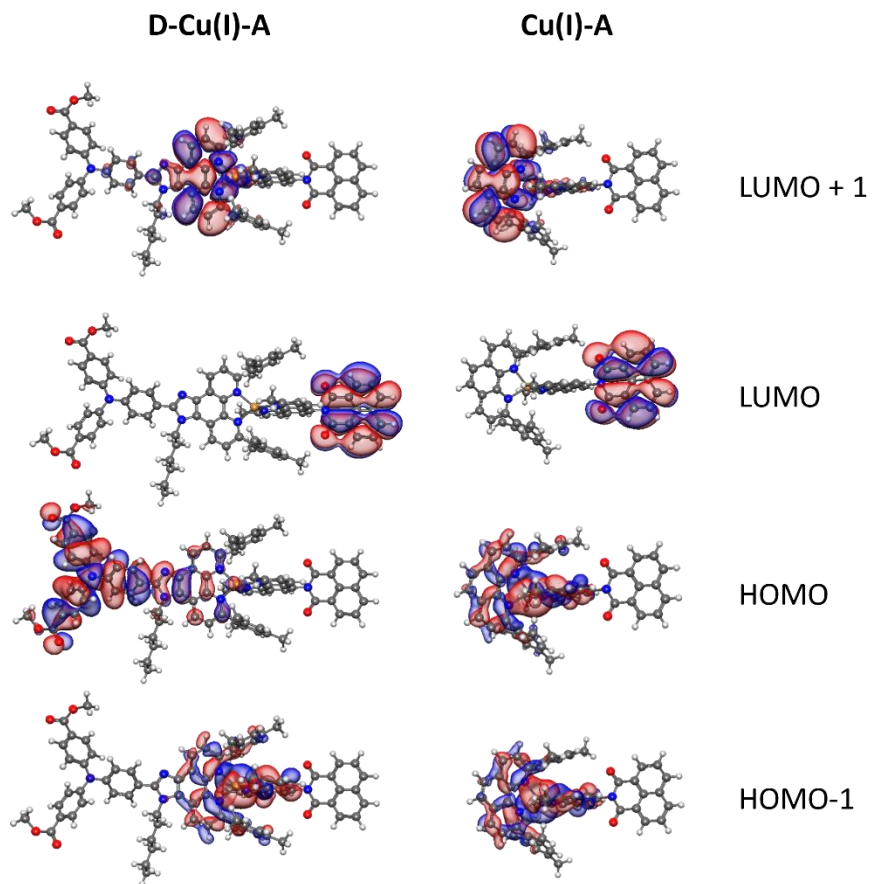

Figure S21. Graphical representation of the frontier orbitals of **D-C(I)-A-H** and **Cu(I)-A-H** with a hydrogen replacing the pendant bromine, drawn at an isovalue of  $0.0200 \text{ \AA}^{-3}$  as calculated using Gaussian 16<sup>1</sup> using the B3PW91 functional<sup>2</sup> with LANL2DZ as the basis set.<sup>3</sup>

### Spectroelectrochemical Analysis of D-Cu(I)-A

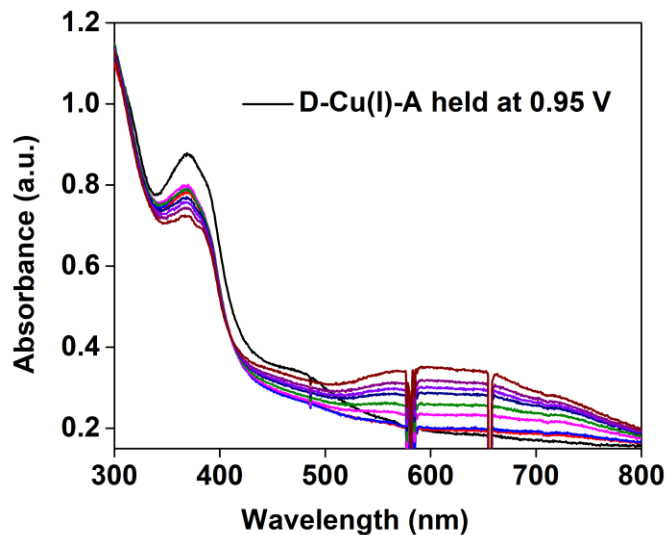

Figure S22. Absorbance spectra of the electrochemically oxidized **D-Cu(I)-A** at 0.95 V taken at different intervals of time.

### Spectroelectrochemical Analysis of Acceptor

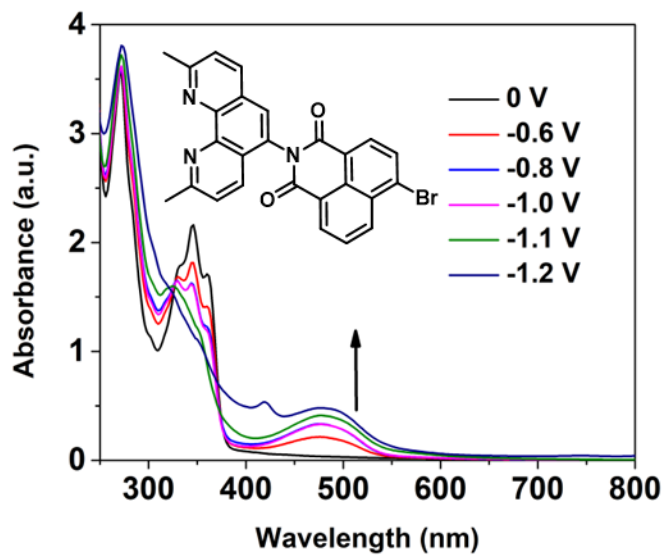

Figure S23. Absorbance spectra of the electrochemically reduced acceptor ligand **A**.



## Femtosecond Transient Absorption Spectroscopy Analysis of D-Cu(I).

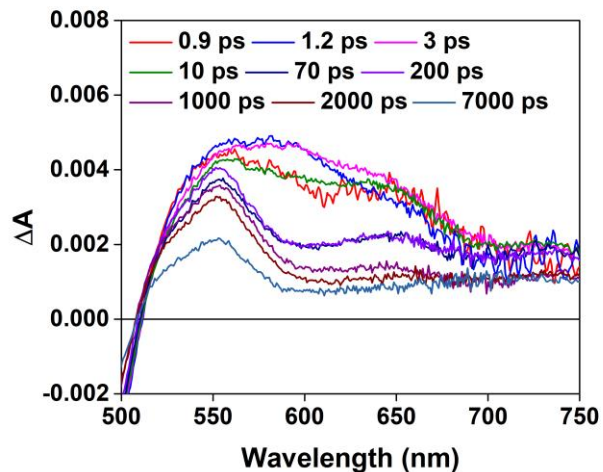

Figure S24. Femtosecond transient absorption difference spectra for **D-Cu(I)** at different time delays after 470 nm excitation ( $2 \mu\text{J} / \text{pulse}$ ).

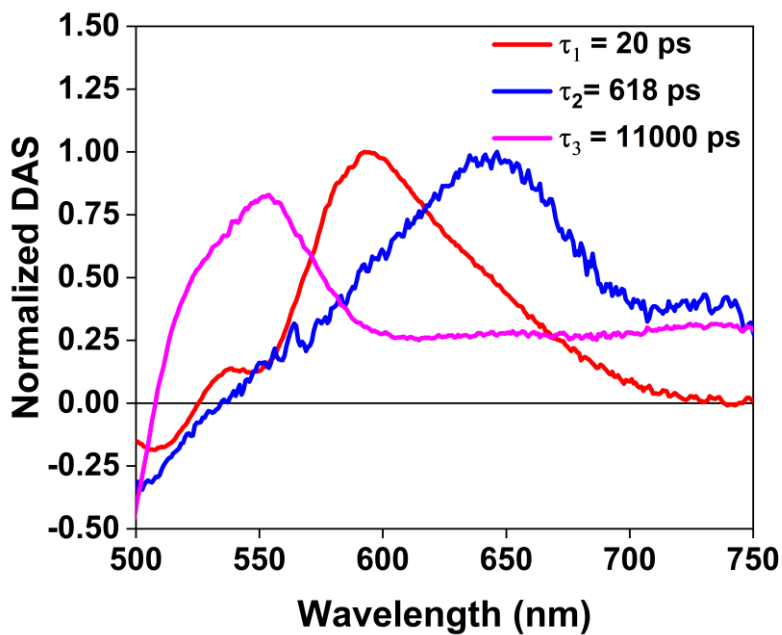

Figure S25. Kinetic analysis displaying decay-associated spectra of **D-Cu(I)** collected in acetonitrile solution.

### Nanosecond Transient Absorption Spectroscopy Analysis.

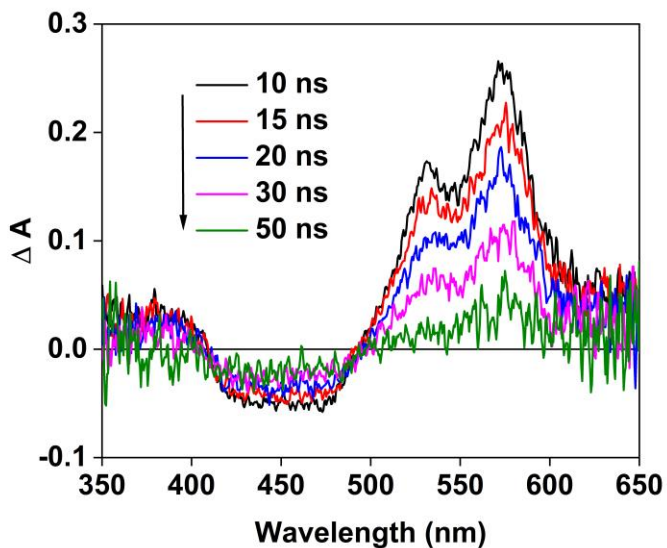

Figure S26. Nanosecond transient absorption difference spectra for reference compound  $[\text{Cu}(\text{dmp})(\text{dmesp})]\text{PF}_6$ .

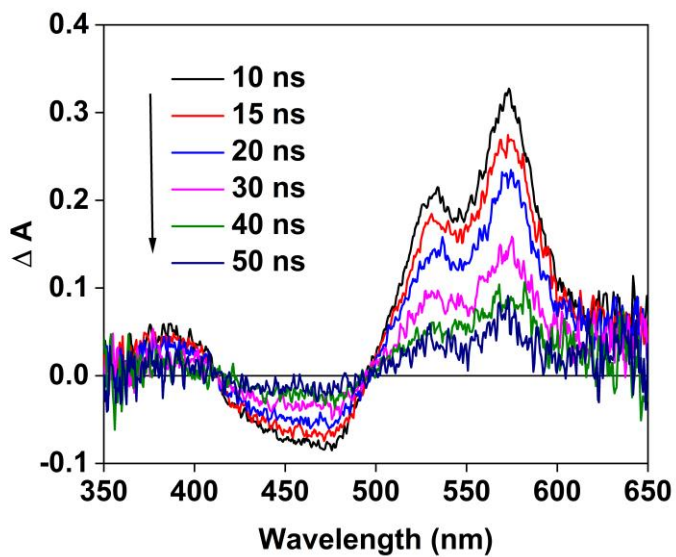

Figure S27. Nanosecond transient absorption difference spectra for the dyad  $\text{Cu}(\text{I})\text{-A}$ .

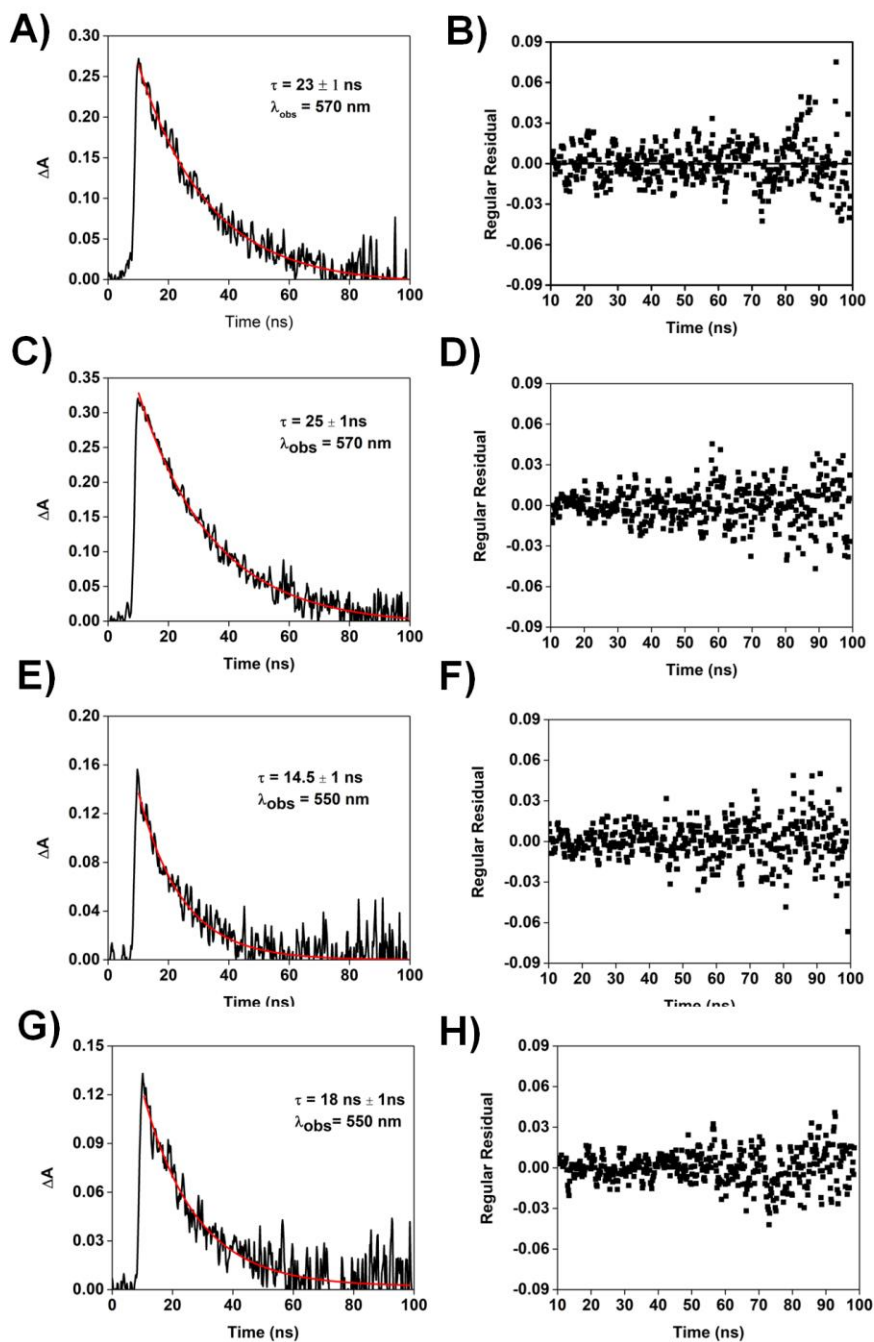

Figure S28. Kinetic traces from the corresponding nanosecond transient absorption and the residual plots of the reference compound  $[\text{Cu}(\text{dmesp})(\text{dmp})][\text{PF}_6]$  (A,B), dyad **Cu(I)-A** (C,D), dyad **D-Cu(I)** (E, F) and triad **D-Cu(I)-A** (G,H).

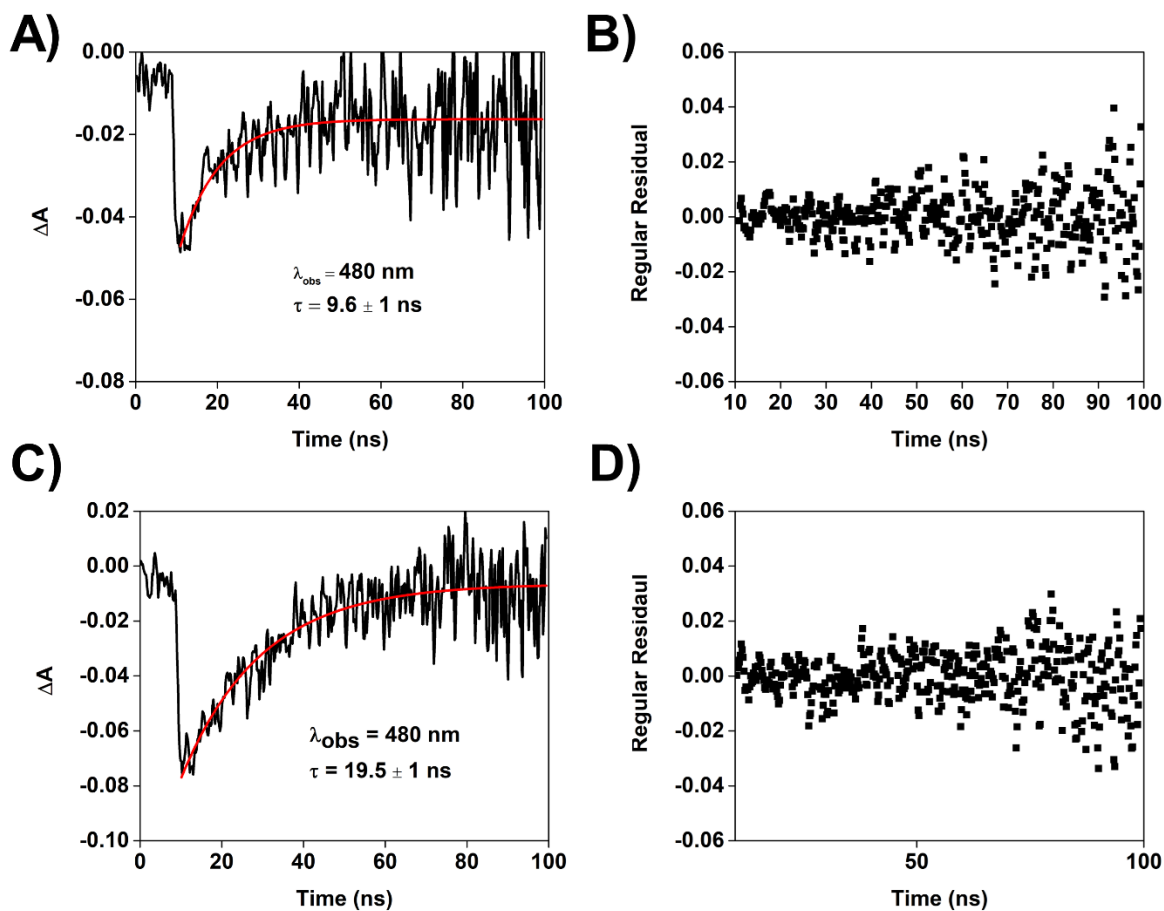

Figure S29. Kinetic traces for the recovery of MLCT bleach at 480 nm from the corresponding nanosecond transient absorption and the residual plots of the reference compound **[Cu(dmesp)(dmp)]PF<sub>6</sub> (A,B)**, dyad **Cu(I)-A (C,D)**.

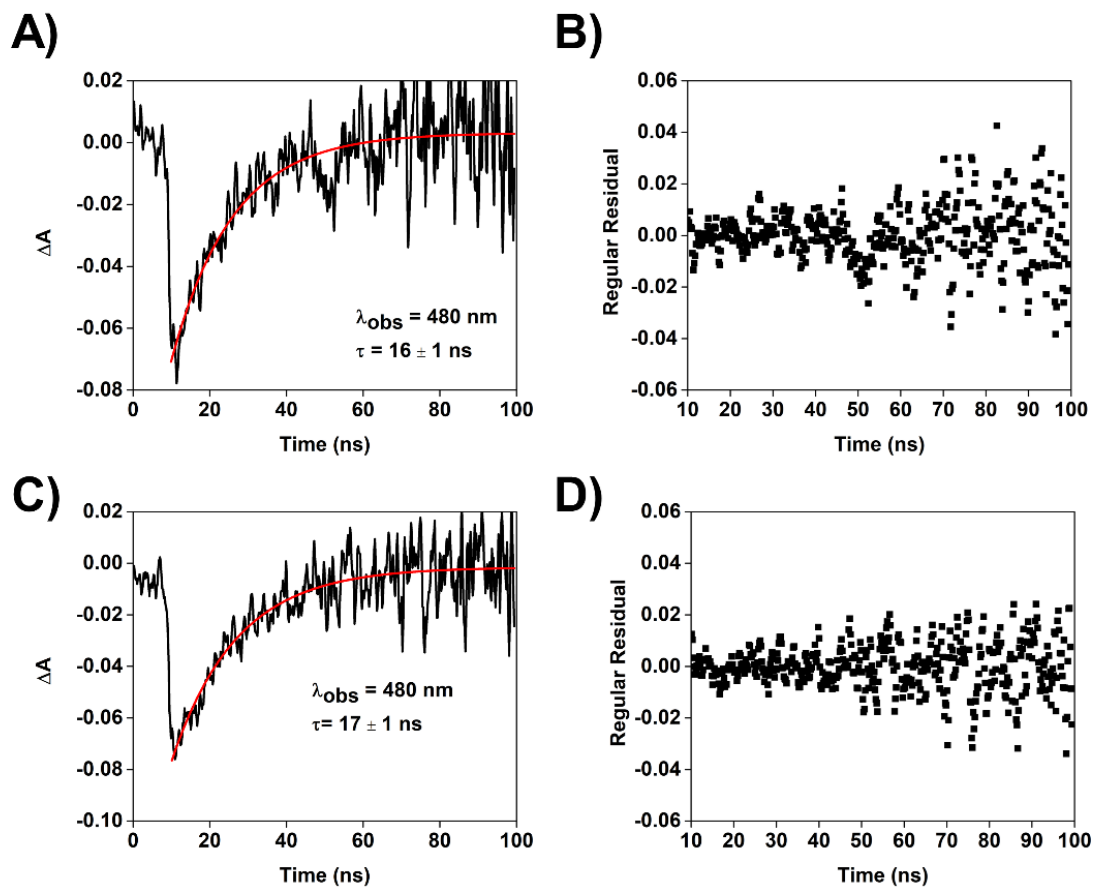

Figure S30. Kinetic traces for the recovery of MLCT bleach at 480 nm from the corresponding nanosecond transient absorption and the residual plots of the dyad **D-Cu(I)** (A,B) and triad **D-Cu(I)-A** (C,D).

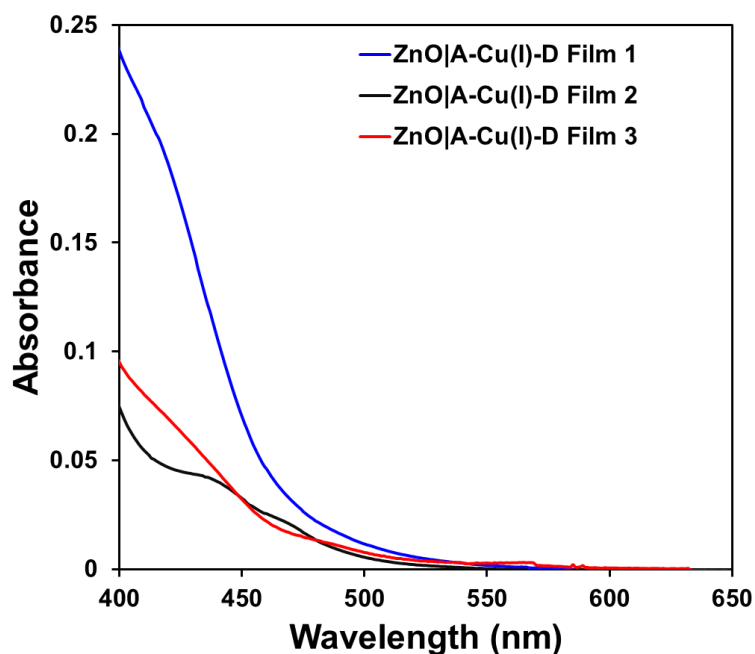

Figure S31. Overlaid absorption spectra of the desorbed complex from three different ZnO|A-Cu(I)-D photoanodes. The films were digested using 0.1 M HCl and then extracted with 10 mL of DCM. The organic layers were collected, analyzed by UV-Vis spectroscopy, and the following analysis was performed on each sample:

Loading Calculations:

Molar absorptivity constant ( $\epsilon$ ) for MLCT transition in A-Cu(I)-D =  $6900 \text{ L}^{-1} \text{ mol}^{-1} \text{ cm}^{-1}$

Optical pathlength of the cuvette ( $l$ ) = 1 cm

Average of the MLCT absorbance for three desorbed films = 0.0312

According to the Beer-Lambert Law:  $A = \epsilon C l = (\epsilon m l) / V$

(Where  $C$  = concentration;  $m$  = moles;  $V$  = volume in Litres)

Therefore, moles of the desorbed A-Cu(I)-D can be calculated as:

$$m = 0.0312 * 10/6900 = 4.52 \times 10^{-5} \text{ mmol}$$

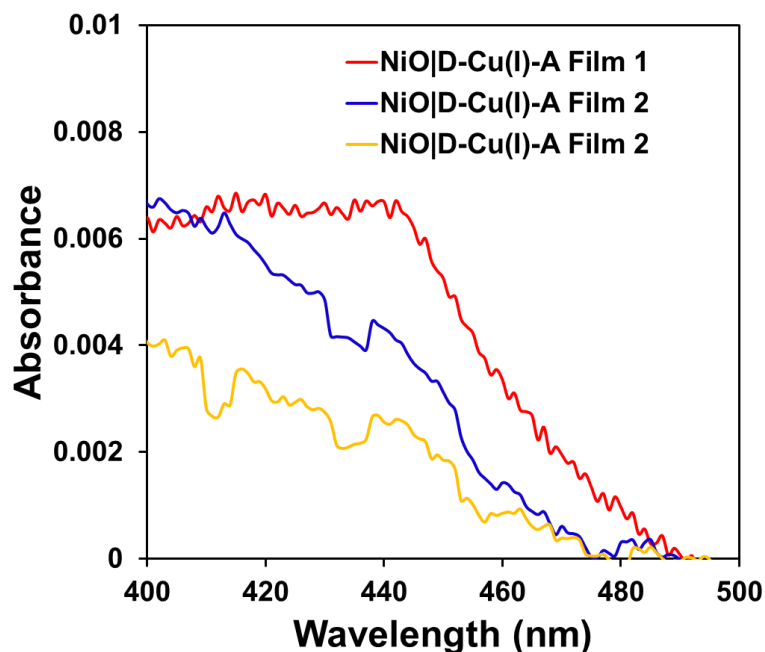

Figure S32. Overlaid absorption spectra of the desorbed complex from three different NiO|D-Cu(I)-A photocathodes. The films were digested using 0.1 M HCl and then extracted with 5 mL of DCM. The organic layers were collected, analyzed by UV-Vis spectroscopy, and the following analysis was performed on each sample:

Loading Calculations:

Molar absorptivity constant ( $\epsilon$ ) for MLCT transition in A-Cu(I)-D =  $6900 \text{ L}^{-1} \text{ mol}^{-1} \text{ cm}^{-1}$

Optical pathlength of the cuvette ( $l$ ) = 1 cm

Average of the MLCT absorbance for three desorbed films = 0.00188

According to the Beer-Lambert Law:  $A = \epsilon C l = (\epsilon m l) / V$

(Where C = concentration; m = moles; V = volume in Litres)

Therefore, moles of the desorbed A-Cu(I)-D can be calculated as:

$$m = 0.00188 * 5/6900 = 1.36 \times 10^{-6} \text{ mmol}$$

## DFT Calculations

D-Cu(I)

| Standard Orientation |               |             |                        |           |           |
|----------------------|---------------|-------------|------------------------|-----------|-----------|
| Center Number        | Atomic Number | Atomic Type | Coordinates (Angstrom) |           |           |
|                      |               |             | X                      | Y         | Z         |
| 1                    | 6             | 0           | 0.872284               | -2.960914 | 0.017944  |
| 2                    | 6             | 0           | 0.884583               | -1.552046 | -0.10588  |
| 3                    | 6             | 0           | 2.135521               | -0.893286 | -0.208428 |
| 4                    | 7             | 0           | 3.322901               | -1.585373 | -0.189936 |
| 5                    | 6             | 0           | 3.306208               | -2.935956 | -0.107073 |
| 6                    | 6             | 0           | 2.079878               | -3.645208 | 0.008612  |
| 7                    | 6             | 0           | -0.301065              | -0.752006 | -0.140236 |
| 8                    | 6             | 0           | -0.252181              | 0.646986  | -0.274667 |
| 9                    | 6             | 0           | 0.996845               | 1.345624  | -0.41237  |
| 10                   | 6             | 0           | 2.192022               | 0.553535  | -0.366742 |
| 11                   | 6             | 0           | 1.173388               | 2.742395  | -0.598038 |
| 12                   | 6             | 0           | 2.446628               | 3.272723  | -0.75276  |
| 13                   | 6             | 0           | 3.585893               | 2.43262   | -0.707088 |
| 14                   | 7             | 0           | 3.442976               | 1.105283  | -0.49262  |
| 15                   | 6             | 0           | 4.594254               | -3.690984 | -0.186037 |
| 16                   | 6             | 0           | 4.94744                | 3.001035  | -0.944314 |
| 17                   | 6             | 0           | 5.323628               | -4.000623 | 0.985572  |
| 18                   | 6             | 0           | 6.521066               | -4.72881  | 0.86994   |
| 19                   | 6             | 0           | 6.999612               | -5.177375 | -0.373761 |
| 20                   | 6             | 0           | 6.241208               | -4.880758 | -1.521196 |
| 21                   | 6             | 0           | 5.039883               | -4.154391 | -1.44909  |
| 22                   | 6             | 0           | 5.429747               | 3.089859  | -2.274288 |
| 23                   | 6             | 0           | 6.702002               | 3.642513  | -2.500069 |
| 24                   | 6             | 0           | 7.499141               | 4.126315  | -1.446077 |
| 25                   | 6             | 0           | 6.986336               | 4.049311  | -0.139339 |
| 26                   | 6             | 0           | 5.71731                | 3.505853  | 0.129245  |
| 27                   | 6             | 0           | 4.226007               | -3.918055 | -2.704663 |
| 28                   | 6             | 0           | 8.27025                | -5.991584 | -0.471124 |
| 29                   | 6             | 0           | 4.8114                 | -3.605905 | 2.353434  |
| 30                   | 6             | 0           | 5.180629               | 3.512856  | 1.543995  |
| 31                   | 6             | 0           | 4.5834                 | 2.641097  | -3.447671 |
| 32                   | 6             | 0           | 8.85087                | 4.747763  | -1.716812 |
| 33                   | 7             | 0           | -1.603146              | -1.200083 | -0.059582 |
| 34                   | 6             | 0           | -2.371554              | -0.100281 | -0.134835 |
| 35                   | 7             | 0           | -1.591098              | 1.05711   | -0.273856 |
| 36                   | 6             | 0           | -3.837817              | -0.17126  | -0.122674 |



|    |    |   |            |           |           |
|----|----|---|------------|-----------|-----------|
| 37 | 6  | 0 | -4.677683  | 0.776747  | 0.501394  |
| 38 | 6  | 0 | -6.065978  | 0.617371  | 0.507404  |
| 39 | 6  | 0 | -6.664662  | -0.497521 | -0.117594 |
| 40 | 6  | 0 | -5.829205  | -1.458915 | -0.729641 |
| 41 | 6  | 0 | -4.44329   | -1.300028 | -0.72135  |
| 42 | 7  | 0 | -8.080069  | -0.652538 | -0.120375 |
| 43 | 6  | 0 | -8.660008  | -1.948971 | 0.026516  |
| 44 | 6  | 0 | -8.920075  | 0.492682  | -0.262872 |
| 45 | 6  | 0 | -10.084501 | 0.629425  | 0.522111  |
| 46 | 6  | 0 | -10.899592 | 1.758023  | 0.386011  |
| 47 | 6  | 0 | -10.561889 | 2.782953  | -0.520475 |
| 48 | 6  | 0 | -9.388717  | 2.650441  | -1.290808 |
| 49 | 6  | 0 | -8.586304  | 1.513559  | -1.179842 |
| 50 | 6  | 0 | -9.784425  | -2.318723 | -0.741495 |
| 51 | 6  | 0 | -10.350887 | -3.589343 | -0.597921 |
| 52 | 6  | 0 | -9.797264  | -4.525317 | 0.298504  |
| 53 | 6  | 0 | -8.660739  | -4.159622 | 1.047794  |
| 54 | 6  | 0 | -8.107762  | -2.882958 | 0.930202  |
| 55 | 6  | 0 | 6.228936   | -0.746036 | -3.139538 |
| 56 | 6  | 0 | 3.973193   | 0.150187  | 3.230962  |
| 57 | 6  | 0 | 5.460996   | 0.06501   | 3.023808  |
| 58 | 7  | 0 | 5.939282   | -0.106264 | 1.775134  |
| 59 | 6  | 0 | 7.296534   | -0.188528 | 1.576455  |
| 60 | 6  | 0 | 8.231612   | -0.097875 | 2.64343   |
| 61 | 6  | 0 | 7.711808   | 0.083959  | 3.952686  |
| 62 | 6  | 0 | 6.340969   | 0.163724  | 4.138581  |
| 63 | 6  | 0 | 7.773419   | -0.377441 | 0.228435  |
| 64 | 6  | 0 | 9.170053   | -0.470233 | -0.011983 |
| 65 | 6  | 0 | 10.092416  | -0.372722 | 1.086677  |
| 66 | 6  | 0 | 9.639714   | -0.192809 | 2.369591  |
| 67 | 7  | 0 | 6.843301   | -0.464261 | -0.779832 |
| 68 | 6  | 0 | 7.256107   | -0.647166 | -2.048829 |
| 69 | 6  | 0 | 8.641546   | -0.748382 | -2.359943 |
| 70 | 6  | 0 | 9.590556   | -0.660517 | -1.355307 |
| 71 | 29 | 0 | 4.934411   | -0.289568 | -0.069142 |
| 72 | 6  | 0 | -10.286294 | -5.933908 | 0.407222  |
| 73 | 8  | 0 | -9.525047  | -6.88253  | 0.630292  |
| 74 | 8  | 0 | -11.630649 | -6.192086 | 0.194308  |
| 75 | 6  | 0 | -12.69736  | -5.26602  | 0.577275  |
| 76 | 6  | 0 | -11.323576 | 4.065557  | -0.619547 |
| 77 | 8  | 0 | -10.767742 | 5.146379  | -0.850104 |
| 78 | 8  | 0 | -12.688776 | 4.052717  | -0.38996  |
| 79 | 6  | 0 | -13.554808 | 2.928382  | -0.748887 |

|     |   |   |            |           |           |
|-----|---|---|------------|-----------|-----------|
| 80  | 6 | 0 | -2.997896  | 7.979839  | 2.667232  |
| 81  | 6 | 0 | -3.039719  | 7.07228   | 1.427408  |
| 82  | 6 | 0 | -2.51791   | 5.651806  | 1.709735  |
| 83  | 6 | 0 | -2.557689  | 4.73782   | 0.47204   |
| 84  | 6 | 0 | -2.034277  | 3.319138  | 0.760124  |
| 85  | 6 | 0 | -2.098149  | 2.422261  | -0.489045 |
| 86  | 1 | 0 | -0.079354  | -3.47421  | 0.107383  |
| 87  | 1 | 0 | 2.111219   | -4.726837 | 0.084842  |
| 88  | 1 | 0 | 0.322934   | 3.409985  | -0.63327  |
| 89  | 1 | 0 | 2.587165   | 4.336111  | -0.914654 |
| 90  | 1 | 0 | 7.084784   | -4.960564 | 1.771864  |
| 91  | 1 | 0 | 6.585057   | -5.234658 | -2.491591 |
| 92  | 1 | 0 | 7.074059   | 3.708157  | -3.521016 |
| 93  | 1 | 0 | 7.581568   | 4.429591  | 0.688913  |
| 94  | 1 | 0 | 3.316023   | -4.532921 | -2.706762 |
| 95  | 1 | 0 | 3.905731   | -2.874482 | -2.79932  |
| 96  | 1 | 0 | 4.798468   | -4.182648 | -3.599525 |
| 97  | 1 | 0 | 8.052227   | -7.065316 | -0.392023 |
| 98  | 1 | 0 | 8.778505   | -5.8328   | -1.428591 |
| 99  | 1 | 0 | 8.97139    | -5.741596 | 0.33257   |
| 100 | 1 | 0 | 4.422428   | -2.583615 | 2.359335  |
| 101 | 1 | 0 | 3.994537   | -4.268177 | 2.67201   |
| 102 | 1 | 0 | 5.603089   | -3.676761 | 3.106263  |
| 103 | 1 | 0 | 5.988962   | 3.640046  | 2.27129   |
| 104 | 1 | 0 | 4.47404    | 4.341596  | 1.691043  |
| 105 | 1 | 0 | 4.650119   | 2.58602   | 1.780188  |
| 106 | 1 | 0 | 4.159931   | 1.642522  | -3.29288  |
| 107 | 1 | 0 | 3.739784   | 3.325331  | -3.610802 |
| 108 | 1 | 0 | 5.170317   | 2.623754  | -4.371546 |
| 109 | 1 | 0 | 9.521302   | 4.644114  | -0.856837 |
| 110 | 1 | 0 | 9.337699   | 4.290931  | -2.5855   |
| 111 | 1 | 0 | 8.751595   | 5.821509  | -1.926331 |
| 112 | 1 | 0 | -4.256429  | 1.619171  | 1.039894  |
| 113 | 1 | 0 | -6.688597  | 1.347636  | 1.014391  |
| 114 | 1 | 0 | -6.269159  | -2.324091 | -1.21527  |
| 115 | 1 | 0 | -3.807812  | -2.045665 | -1.188304 |
| 116 | 1 | 0 | -10.335679 | -0.137579 | 1.248013  |
| 117 | 1 | 0 | -11.770351 | 1.861066  | 1.026554  |
| 118 | 1 | 0 | -9.119893  | 3.449834  | -1.975009 |
| 119 | 1 | 0 | -7.698688  | 1.411583  | -1.796324 |
| 120 | 1 | 0 | -10.198233 | -1.618188 | -1.460072 |
| 121 | 1 | 0 | -11.193195 | -3.866455 | -1.224677 |
| 122 | 1 | 0 | -8.220894  | -4.88976  | 1.720686  |

|     |   |   |            |           |           |
|-----|---|---|------------|-----------|-----------|
| 123 | 1 | 0 | -7.246453  | -2.607101 | 1.530436  |
| 124 | 1 | 0 | 5.223178   | -0.651121 | -2.72373  |
| 125 | 1 | 0 | 6.37886    | 0.042381  | -3.886429 |
| 126 | 1 | 0 | 6.306077   | -1.709436 | -3.656928 |
| 127 | 1 | 0 | 3.446131   | 0.059842  | 2.279591  |
| 128 | 1 | 0 | 3.625696   | -0.646242 | 3.90076   |
| 129 | 1 | 0 | 3.697275   | 1.104063  | 3.69767   |
| 130 | 1 | 0 | 8.391981   | 0.157699  | 4.797009  |
| 131 | 1 | 0 | 5.920192   | 0.30065   | 5.129679  |
| 132 | 1 | 0 | 11.157275  | -0.445645 | 0.881522  |
| 133 | 1 | 0 | 10.339069  | -0.120734 | 3.1984    |
| 134 | 1 | 0 | 8.936968   | -0.895733 | -3.393807 |
| 135 | 1 | 0 | 10.650334  | -0.736877 | -1.583049 |
| 136 | 1 | 0 | -13.396559 | -5.843993 | 1.186025  |
| 137 | 1 | 0 | -12.316773 | -4.415488 | 1.151896  |
| 138 | 1 | 0 | -13.204173 | -4.912252 | -0.325296 |
| 139 | 1 | 0 | -14.367753 | 3.350846  | -1.343825 |
| 140 | 1 | 0 | -13.0223   | 2.168713  | -1.329978 |
| 141 | 1 | 0 | -13.962029 | 2.485239  | 0.164541  |
| 142 | 1 | 0 | -3.375362  | 8.983264  | 2.437674  |
| 143 | 1 | 0 | -3.613402  | 7.569564  | 3.478164  |
| 144 | 1 | 0 | -1.97296   | 8.086396  | 3.046215  |
| 145 | 1 | 0 | -2.443736  | 7.524941  | 0.620766  |
| 146 | 1 | 0 | -4.071953  | 7.011774  | 1.052578  |
| 147 | 1 | 0 | -3.115891  | 5.200656  | 2.516304  |
| 148 | 1 | 0 | -1.485336  | 5.713174  | 2.087668  |
| 149 | 1 | 0 | -1.963984  | 5.196055  | -0.335106 |
| 150 | 1 | 0 | -3.591158  | 4.680384  | 0.097724  |
| 151 | 1 | 0 | -2.62332   | 2.864457  | 1.567852  |
| 152 | 1 | 0 | -1.004197  | 3.37367   | 1.137862  |
| 153 | 1 | 0 | -1.53895   | 2.871422  | -1.318141 |
| 154 | 1 | 0 | -3.132744  | 2.336302  | -0.832867 |

## D-Cu(I)-A

| Standard Orientation |               |             |                        |           |           |
|----------------------|---------------|-------------|------------------------|-----------|-----------|
| Center Number        | Atomic Number | Atomic Type | Coordinates (Angstrom) |           |           |
|                      |               |             | X                      | Y         | Z         |
| 1                    | 6             | 0           | 1.803487               | 2.919315  | 0.087663  |
| 2                    | 6             | 0           | 1.827388               | 1.510965  | -0.040864 |
| 3                    | 6             | 0           | 0.592261               | 0.820642  | -0.124934 |
| 4                    | 7             | 0           | -0.611857              | 1.481598  | -0.08671  |
| 5                    | 6             | 0           | -0.630998              | 2.832743  | 0.000452  |
| 6                    | 6             | 0           | 0.578102               | 3.572506  | 0.099618  |
| 7                    | 6             | 0           | 3.031841               | 0.739683  | -0.097162 |
| 8                    | 6             | 0           | 3.014578               | -0.660217 | -0.234118 |
| 9                    | 6             | 0           | 1.781128               | -1.390519 | -0.351431 |
| 10                   | 6             | 0           | 0.569368               | -0.626877 | -0.284478 |
| 11                   | 6             | 0           | 1.632443               | -2.791149 | -0.534423 |
| 12                   | 6             | 0           | 0.368372               | -3.352944 | -0.657215 |
| 13                   | 6             | 0           | -0.788925              | -2.540445 | -0.585825 |
| 14                   | 7             | 0           | -0.668858              | -1.208122 | -0.386005 |
| 15                   | 6             | 0           | -1.947054              | 3.540125  | -0.057421 |
| 16                   | 6             | 0           | -2.152491              | -3.125518 | -0.761633 |
| 17                   | 6             | 0           | -2.7158                | 3.739421  | 1.114767  |
| 18                   | 6             | 0           | -3.959425              | 4.383968  | 1.012542  |
| 19                   | 6             | 0           | -4.452992              | 4.855923  | -0.217915 |
| 20                   | 6             | 0           | -3.649943              | 4.688026  | -1.359517 |
| 21                   | 6             | 0           | -2.399332              | 4.045359  | -1.300798 |
| 22                   | 6             | 0           | -2.709825              | -3.198722 | -2.061554 |
| 23                   | 6             | 0           | -4.00427               | -3.726176 | -2.217937 |
| 24                   | 6             | 0           | -4.754376              | -4.193393 | -1.123613 |
| 25                   | 6             | 0           | -4.158533              | -4.149812 | 0.150549  |
| 26                   | 6             | 0           | -2.866645              | -3.634759 | 0.349467  |
| 27                   | 6             | 0           | -1.55009               | 3.940066  | -2.551259 |
| 28                   | 6             | 0           | -5.805455              | 5.527134  | -0.298565 |
| 29                   | 6             | 0           | -2.194137              | 3.323555  | 2.472485  |
| 30                   | 6             | 0           | -2.245914              | -3.682381 | 1.729052  |
| 31                   | 6             | 0           | -1.920137              | -2.76425  | -3.278916 |
| 32                   | 6             | 0           | -6.158475              | -4.724123 | -1.300623 |
| 33                   | 7             | 0           | 4.324624               | 1.218349  | -0.036557 |
| 34                   | 6             | 0           | 5.117598               | 0.137067  | -0.126613 |
| 35                   | 7             | 0           | 4.362537               | -1.038056 | -0.255895 |
| 36                   | 6             | 0           | 6.581937               | 0.239546  | -0.137338 |
| 37                   | 6             | 0           | 7.450016               | -0.694833 | 0.46836   |
| 38                   | 6             | 0           | 8.835087               | -0.512841 | 0.447063  |

|    |    |   |            |           |           |
|----|----|---|------------|-----------|-----------|
| 39 | 6  | 0 | 9.403644   | 0.613006  | -0.186783 |
| 40 | 6  | 0 | 8.539623   | 1.563204  | -0.776794 |
| 41 | 6  | 0 | 7.156783   | 1.380815  | -0.742654 |
| 42 | 7  | 0 | 10.815395  | 0.783856  | -0.224486 |
| 43 | 6  | 0 | 11.395443  | 2.079213  | -0.076772 |
| 44 | 6  | 0 | 11.661572  | -0.358205 | -0.376996 |
| 45 | 6  | 0 | 12.82442   | -0.498255 | 0.408808  |
| 46 | 6  | 0 | 13.64511   | -1.621383 | 0.26001   |
| 47 | 6  | 0 | 13.313399  | -2.636232 | -0.659695 |
| 48 | 6  | 0 | 12.140392  | -2.500861 | -1.429737 |
| 49 | 6  | 0 | 11.332535  | -1.368899 | -1.306057 |
| 50 | 6  | 0 | 12.533629  | 2.439723  | -0.830933 |
| 51 | 6  | 0 | 13.121508  | 3.694835  | -0.662026 |
| 52 | 6  | 0 | 12.571031  | 4.634569  | 0.232802  |
| 53 | 6  | 0 | 11.433938  | 4.273676  | 0.983078  |
| 54 | 6  | 0 | 10.857274  | 3.007875  | 0.839833  |
| 55 | 8  | 0 | -8.66648   | -2.393986 | 0.071822  |
| 56 | 8  | 0 | -8.868845  | 2.138573  | 0.950172  |
| 57 | 35 | 0 | -15.616579 | 1.139811  | -0.518065 |
| 58 | 6  | 0 | -11.458301 | -2.552867 | -0.473323 |
| 59 | 6  | 0 | -12.847193 | -2.573012 | -0.739684 |
| 60 | 6  | 0 | -13.597478 | -1.408065 | -0.646666 |
| 61 | 6  | 0 | -12.989633 | -0.17181  | -0.282623 |
| 62 | 6  | 0 | -13.701444 | 1.064974  | -0.169851 |
| 63 | 6  | 0 | -13.062434 | 2.245067  | 0.187727  |
| 64 | 6  | 0 | -11.674347 | 2.242574  | 0.450193  |
| 65 | 6  | 0 | -9.381072  | -1.37154  | 0.162083  |
| 66 | 6  | 0 | -10.832972 | -1.361972 | -0.113713 |
| 67 | 6  | 0 | -11.579358 | -0.152272 | -0.010513 |
| 68 | 6  | 0 | -10.938557 | 1.065478  | 0.354762  |
| 69 | 6  | 0 | -9.490666  | 1.099565  | 0.64004   |
| 70 | 7  | 0 | -8.799635  | -0.137115 | 0.54575   |
| 71 | 6  | 0 | -3.341486  | 0.702562  | -3.107975 |
| 72 | 6  | 0 | -1.38107   | -0.299553 | 3.337856  |
| 73 | 6  | 0 | -2.857063  | -0.313001 | 3.04736   |
| 74 | 7  | 0 | -3.277617  | -0.129203 | 1.779871  |
| 75 | 6  | 0 | -4.623757  | -0.137299 | 1.507305  |
| 76 | 6  | 0 | -5.60458   | -0.335717 | 2.514743  |
| 77 | 6  | 0 | -5.147846  | -0.528301 | 3.844995  |
| 78 | 6  | 0 | -3.787206  | -0.51579  | 4.105833  |
| 79 | 6  | 0 | -5.04298   | 0.069788  | 0.143022  |
| 80 | 6  | 0 | -6.425378  | 0.075047  | -0.17749  |
| 81 | 6  | 0 | -7.388584  | -0.137432 | 0.870868  |

|     |    |   |           |           |           |
|-----|----|---|-----------|-----------|-----------|
| 82  | 6  | 0 | -6.994825 | -0.334468 | 2.165576  |
| 83  | 7  | 0 | -4.067133 | 0.262105  | -0.804423 |
| 84  | 6  | 0 | -4.417957 | 0.475618  | -2.086287 |
| 85  | 6  | 0 | -5.786777 | 0.495704  | -2.472647 |
| 86  | 6  | 0 | -6.782004 | 0.295564  | -1.532545 |
| 87  | 29 | 0 | -2.193246 | 0.151389  | 0.00673   |
| 88  | 6  | 0 | 13.293119 | 5.928433  | 0.427548  |
| 89  | 8  | 0 | 14.520621 | 6.026159  | 0.319834  |
| 90  | 8  | 0 | 12.563208 | 7.047634  | 0.799403  |
| 91  | 6  | 0 | 11.202801 | 7.308167  | 0.328217  |
| 92  | 6  | 0 | 14.083034 | -3.913327 | -0.776302 |
| 93  | 8  | 0 | 13.53088  | -4.994345 | -1.016186 |
| 94  | 8  | 0 | 15.448526 | -3.896272 | -0.556376 |
| 95  | 6  | 0 | 16.306451 | -2.756125 | -0.886477 |
| 96  | 6  | 0 | 5.95219   | -7.942405 | 2.634667  |
| 97  | 6  | 0 | 5.956987  | -7.029551 | 1.398039  |
| 98  | 6  | 0 | 5.415374  | -5.619539 | 1.695106  |
| 99  | 6  | 0 | 5.417131  | -4.700534 | 0.460496  |
| 100 | 6  | 0 | 4.872668  | -3.292864 | 0.763253  |
| 101 | 6  | 0 | 4.896147  | -2.391114 | -0.483823 |
| 102 | 1  | 0 | 2.742322  | 3.45751   | 0.165138  |
| 103 | 1  | 0 | 0.520119  | 4.652494  | 0.183136  |
| 104 | 1  | 0 | 2.49712   | -3.438874 | -0.589385 |
| 105 | 1  | 0 | 0.249974  | -4.420147 | -0.811348 |
| 106 | 1  | 0 | -4.554984 | 4.525575  | 1.912762  |
| 107 | 1  | 0 | -3.999984 | 5.071281  | -2.316233 |
| 108 | 1  | 0 | -4.433873 | -3.77886  | -3.216556 |
| 109 | 1  | 0 | -4.712285 | -4.529419 | 1.007542  |
| 110 | 1  | 0 | -0.696883 | 4.630243  | -2.50907  |
| 111 | 1  | 0 | -1.139152 | 2.933729  | -2.690064 |
| 112 | 1  | 0 | -2.130807 | 4.197721  | -3.442947 |
| 113 | 1  | 0 | -6.607052 | 4.831826  | -0.017861 |
| 114 | 1  | 0 | -5.864938 | 6.383073  | 0.385216  |
| 115 | 1  | 0 | -6.014485 | 5.891682  | -1.309477 |
| 116 | 1  | 0 | -1.693034 | 2.352752  | 2.433246  |
| 117 | 1  | 0 | -1.464304 | 4.053629  | 2.849405  |
| 118 | 1  | 0 | -3.005781 | 3.263131  | 3.204812  |
| 119 | 1  | 0 | -3.01611  | -3.734549 | 2.505628  |
| 120 | 1  | 0 | -1.610079 | -4.571984 | 1.839771  |
| 121 | 1  | 0 | -1.618203 | -2.808567 | 1.925599  |
| 122 | 1  | 0 | -1.466088 | -1.776176 | -3.14518  |
| 123 | 1  | 0 | -1.102804 | -3.467142 | -3.490124 |
| 124 | 1  | 0 | -2.557121 | -2.730668 | -4.168604 |

|     |   |   |            |           |           |
|-----|---|---|------------|-----------|-----------|
| 125 | 1 | 0 | -6.896065  | -4.037303 | -0.866568 |
| 126 | 1 | 0 | -6.405623  | -4.858638 | -2.358939 |
| 127 | 1 | 0 | -6.281802  | -5.693049 | -0.801321 |
| 128 | 1 | 0 | 7.053547   | -1.545599 | 1.012379  |
| 129 | 1 | 0 | 9.479718   | -1.234825 | 0.938019  |
| 130 | 1 | 0 | 8.95692    | 2.435072  | -1.270571 |
| 131 | 1 | 0 | 6.499292   | 2.115405  | -1.196713 |
| 132 | 1 | 0 | 13.074096  | 0.262844  | 1.141377  |
| 133 | 1 | 0 | 14.516522  | -1.726125 | 0.899157  |
| 134 | 1 | 0 | 11.876443  | -3.29342  | -2.123678 |
| 135 | 1 | 0 | 10.444952  | -1.262947 | -1.922074 |
| 136 | 1 | 0 | 12.95411   | 1.733728  | -1.540034 |
| 137 | 1 | 0 | 14.013145  | 3.964364  | -1.220388 |
| 138 | 1 | 0 | 11.026374  | 4.959981  | 1.719338  |
| 139 | 1 | 0 | 10.003454  | 2.729879  | 1.449808  |
| 140 | 1 | 0 | -10.86117  | -3.457092 | -0.541997 |
| 141 | 1 | 0 | -13.327623 | -3.505587 | -1.017565 |
| 142 | 1 | 0 | -14.662926 | -1.431032 | -0.852472 |
| 143 | 1 | 0 | -13.624874 | 3.168782  | 0.267087  |
| 144 | 1 | 0 | -11.165637 | 3.159485  | 0.731423  |
| 145 | 1 | 0 | -2.35477   | 0.611566  | -2.648049 |
| 146 | 1 | 0 | -3.421523  | -0.021566 | -3.926887 |
| 147 | 1 | 0 | -3.432505  | 1.704293  | -3.543939 |
| 148 | 1 | 0 | -0.808633  | -0.160032 | 2.418708  |
| 149 | 1 | 0 | -1.128089  | 0.509215  | 4.034646  |
| 150 | 1 | 0 | -1.067465  | -1.238533 | 3.810323  |
| 151 | 1 | 0 | -5.865838  | -0.682122 | 4.645828  |
| 152 | 1 | 0 | -3.412123  | -0.658474 | 5.114247  |
| 153 | 1 | 0 | -7.738331  | -0.489385 | 2.942082  |
| 154 | 1 | 0 | -6.034321  | 0.670918  | -3.514646 |
| 155 | 1 | 0 | -7.827287  | 0.308826  | -1.823214 |
| 156 | 1 | 0 | 11.218039  | 8.310364  | -0.106845 |
| 157 | 1 | 0 | 10.881196  | 6.579933  | -0.423333 |
| 158 | 1 | 0 | 10.519765  | 7.290407  | 1.182628  |
| 159 | 1 | 0 | 17.128662  | -3.16078  | -1.480781 |
| 160 | 1 | 0 | 15.771862  | -1.99192  | -1.459408 |
| 161 | 1 | 0 | 16.700901  | -2.32482  | 0.037991  |
| 162 | 1 | 0 | 6.342968   | -8.938239 | 2.394544  |
| 163 | 1 | 0 | 6.574408   | -7.524601 | 3.436578  |
| 164 | 1 | 0 | 4.935897   | -8.068122 | 3.030695  |
| 165 | 1 | 0 | 5.355202   | -7.489479 | 0.599851  |
| 166 | 1 | 0 | 6.981425   | -6.949583 | 1.005902  |
| 167 | 1 | 0 | 6.019486   | -5.160841 | 2.492797  |

|     |   |   |          |           |           |
|-----|---|---|----------|-----------|-----------|
| 168 | 1 | 0 | 4.390833 | -5.700416 | 2.090824  |
| 169 | 1 | 0 | 4.817895 | -5.166698 | -0.337997 |
| 170 | 1 | 0 | 6.442707 | -4.622862 | 0.068556  |
| 171 | 1 | 0 | 5.467894 | -2.829941 | 1.561718  |
| 172 | 1 | 0 | 3.851008 | -3.367989 | 1.159706  |
| 173 | 1 | 0 | 4.332519 | -2.850004 | -1.304527 |
| 174 | 1 | 0 | 5.922554 | -2.28184  | -0.845059 |



## Cu(I)-A

| Standard Orientation |               |             |                         |           |           |
|----------------------|---------------|-------------|-------------------------|-----------|-----------|
| Center Number        | Atomic Number | Atomic Type | Coordinates (Angstroms) |           |           |
|                      |               |             | X                       | Y         | Z         |
| 1                    | 6             | 0           | 7.068141                | 2.757326  | -0.146086 |
| 2                    | 6             | 0           | 7.061408                | 1.340205  | -0.222678 |
| 3                    | 6             | 0           | 5.795616                | 0.692877  | -0.233115 |
| 4                    | 7             | 0           | 4.60817                 | 1.38432   | -0.173065 |
| 5                    | 6             | 0           | 4.629299                | 2.737618  | -0.141034 |
| 6                    | 6             | 0           | 5.863597                | 3.445032  | -0.115298 |
| 7                    | 6             | 0           | 8.265445                | 0.555055  | -0.292632 |
| 8                    | 6             | 0           | 8.208767                | -0.812651 | -0.384259 |
| 9                    | 6             | 0           | 6.942984                | -1.496366 | -0.412781 |
| 10                   | 6             | 0           | 5.736824                | -0.748007 | -0.33319  |
| 11                   | 6             | 0           | 6.827802                | -2.907012 | -0.521884 |
| 12                   | 6             | 0           | 5.569024                | -3.490683 | -0.558045 |
| 13                   | 6             | 0           | 4.400335                | -2.683116 | -0.481562 |
| 14                   | 7             | 0           | 4.497788                | -1.339331 | -0.359942 |
| 15                   | 6             | 0           | 3.339319                | 3.491146  | -0.180986 |
| 16                   | 6             | 0           | 3.043648                | -3.303521 | -0.560209 |
| 17                   | 6             | 0           | 2.904311                | 4.03846   | -1.412589 |
| 18                   | 6             | 0           | 1.683729                | 4.738372  | -1.451083 |
| 19                   | 6             | 0           | 0.897155                | 4.9243    | -0.301327 |
| 20                   | 6             | 0           | 1.373589                | 4.404616  | 0.917038  |
| 21                   | 6             | 0           | 2.584858                | 3.699804  | 0.999478  |
| 22                   | 6             | 0           | 2.374632                | -3.353025 | -1.808085 |
| 23                   | 6             | 0           | 1.093844                | -3.928215 | -1.869927 |
| 24                   | 6             | 0           | 0.462243                | -4.463553 | -0.732021 |
| 25                   | 6             | 0           | 1.166143                | -4.436997 | 0.485545  |
| 26                   | 6             | 0           | 2.450679                | -3.875631 | 0.590395  |
| 27                   | 6             | 0           | 3.092526                | 3.225737  | 2.342992  |
| 28                   | 6             | 0           | -0.418754               | 5.666334  | -0.359793 |
| 29                   | 6             | 0           | 3.734523                | 3.914513  | -2.674552 |
| 30                   | 6             | 0           | 3.185527                | -3.933844 | 1.91301   |
| 31                   | 6             | 0           | 3.039098                | -2.850718 | -3.072531 |
| 32                   | 6             | 0           | -0.933402               | -5.037643 | -0.80961  |
| 33                   | 8             | 0           | -3.438102               | -2.571802 | 0.089867  |
| 34                   | 8             | 0           | -3.680751               | 1.948116  | 1.019467  |
| 35                   | 35            | 0           | -10.42782               | 0.895953  | -0.415459 |
| 36                   | 6             | 0           | -6.23084                | -2.75265  | -0.443299 |
| 37                   | 6             | 0           | -7.621106               | -2.784191 | -0.701069 |
| 38                   | 6             | 0           | -8.382888               | -1.628408 | -0.588978 |

|    |    |   |           |           |           |
|----|----|---|-----------|-----------|-----------|
| 39 | 6  | 0 | -7.785652 | -0.390306 | -0.21383  |
| 40 | 6  | 0 | -8.509846 | 0.837304  | -0.081012 |
| 41 | 6  | 0 | -7.880951 | 2.019671  | 0.287023  |
| 42 | 6  | 0 | -6.491191 | 2.028838  | 0.54002   |
| 43 | 6  | 0 | -4.162103 | -1.557459 | 0.19341   |
| 44 | 6  | 0 | -5.615586 | -1.559605 | -0.073375 |
| 45 | 6  | 0 | -6.373853 | -0.359095 | 0.049069  |
| 46 | 6  | 0 | -5.743582 | 0.860923  | 0.42492   |
| 47 | 6  | 0 | -4.294331 | 0.907083  | 0.700223  |
| 48 | 7  | 0 | -3.590415 | -0.320877 | 0.584565  |
| 49 | 6  | 0 | 1.82371   | 0.716347  | -3.084784 |
| 50 | 6  | 0 | 3.848145  | -0.388923 | 3.327623  |
| 51 | 6  | 0 | 2.371934  | -0.443254 | 3.042795  |
| 52 | 7  | 0 | 1.939439  | -0.237803 | 1.782634  |
| 53 | 6  | 0 | 0.592295  | -0.271639 | 1.51664   |
| 54 | 6  | 0 | -0.377417 | -0.515986 | 2.52456   |
| 55 | 6  | 0 | 0.091855  | -0.733337 | 3.846602  |
| 56 | 6  | 0 | 1.453317  | -0.697127 | 4.100227  |
| 57 | 6  | 0 | 0.159649  | -0.041463 | 0.160004  |
| 58 | 6  | 0 | -1.225186 | -0.052781 | -0.150318 |
| 59 | 6  | 0 | -2.177117 | -0.308025 | 0.898969  |
| 60 | 6  | 0 | -1.769889 | -0.532062 | 2.185055  |
| 61 | 7  | 0 | 1.124746  | 0.190163  | -0.790152 |
| 62 | 6  | 0 | 0.760256  | 0.433475  | -2.063033 |
| 63 | 6  | 0 | -0.611758 | 0.437679  | -2.438912 |
| 64 | 6  | 0 | -1.595715 | 0.194112  | -1.497151 |
| 65 | 29 | 0 | 3.006973  | 0.062857  | 0.005194  |
| 66 | 1  | 0 | 8.013792  | 3.292175  | -0.122591 |
| 67 | 1  | 0 | 5.838379  | 4.528448  | -0.070235 |
| 68 | 1  | 0 | 9.223264  | 1.068243  | -0.275794 |
| 69 | 1  | 0 | 9.120801  | -1.400893 | -0.440775 |
| 70 | 1  | 0 | 7.724499  | -3.517815 | -0.583515 |
| 71 | 1  | 0 | 5.45194   | -4.564745 | -0.653582 |
| 72 | 1  | 0 | 1.345788  | 5.153516  | -2.398703 |
| 73 | 1  | 0 | 0.790539  | 4.557148  | 1.823442  |
| 74 | 1  | 0 | 0.580193  | -3.966581 | -2.828684 |
| 75 | 1  | 0 | 0.706242  | -4.867775 | 1.373163  |
| 76 | 1  | 0 | 3.940399  | 3.837918  | 2.680407  |
| 77 | 1  | 0 | 2.310779  | 3.296698  | 3.105769  |
| 78 | 1  | 0 | 3.43424   | 2.187978  | 2.298151  |
| 79 | 1  | 0 | -0.626523 | 6.039983  | -1.3675   |
| 80 | 1  | 0 | -1.251268 | 5.015805  | -0.062711 |
| 81 | 1  | 0 | -0.419741 | 6.525403  | 0.322696  |

|     |   |   |           |           |           |
|-----|---|---|-----------|-----------|-----------|
| 82  | 1 | 0 | 4.604446  | 4.584156  | -2.645149 |
| 83  | 1 | 0 | 4.11801   | 2.89869   | -2.823077 |
| 84  | 1 | 0 | 3.147748  | 4.1883    | -3.557305 |
| 85  | 1 | 0 | 2.484567  | -4.048962 | 2.746232  |
| 86  | 1 | 0 | 3.871028  | -4.792124 | 1.943985  |
| 87  | 1 | 0 | 3.784958  | -3.035815 | 2.090584  |
| 88  | 1 | 0 | 3.447674  | -1.84221  | -2.948314 |
| 89  | 1 | 0 | 3.873487  | -3.502703 | -3.365036 |
| 90  | 1 | 0 | 2.331086  | -2.833891 | -3.907174 |
| 91  | 1 | 0 | -1.176279 | -5.362313 | -1.827277 |
| 92  | 1 | 0 | -1.047059 | -5.900809 | -0.143749 |
| 93  | 1 | 0 | -1.68053  | -4.291043 | -0.511078 |
| 94  | 1 | 0 | -5.6249   | -3.649749 | -0.526691 |
| 95  | 1 | 0 | -8.093559 | -3.718317 | -0.987245 |
| 96  | 1 | 0 | -9.44938  | -1.66016  | -0.788092 |
| 97  | 1 | 0 | -8.452662 | 2.936218  | 0.381729  |
| 98  | 1 | 0 | -5.990345 | 2.947621  | 0.829161  |
| 99  | 1 | 0 | 2.816506  | 0.615857  | -2.640012 |
| 100 | 1 | 0 | 1.74223   | 0.031955  | -3.937072 |
| 101 | 1 | 0 | 1.718196  | 1.737019  | -3.470823 |
| 102 | 1 | 0 | 4.182693  | -1.299404 | 3.83879   |
| 103 | 1 | 0 | 4.415445  | -0.275205 | 2.401614  |
| 104 | 1 | 0 | 4.085665  | 0.454458  | 3.988384  |
| 105 | 1 | 0 | -0.617536 | -0.92396  | 4.647139  |
| 106 | 1 | 0 | 1.837512  | -0.857178 | 5.10254   |
| 107 | 1 | 0 | -2.504585 | -0.720394 | 2.962532  |
| 108 | 1 | 0 | -0.870695 | 0.635792  | -3.474    |
| 109 | 1 | 0 | -2.64321  | 0.194422  | -1.779988 |

## D-Cu(I)-A-H

| Standard Orientation |               |             |                        |           |           |
|----------------------|---------------|-------------|------------------------|-----------|-----------|
| Center Number        | Atomic Number | Atomic Type | Coordinates (Angstrom) |           |           |
|                      |               |             | X                      | Y         | Z         |
| 1                    | 6             | 0           | 1.109643               | 2.95631   | 0.056292  |
| 2                    | 6             | 0           | 1.111994               | 1.547181  | -0.065654 |
| 3                    | 6             | 0           | -0.133397              | 0.876141  | -0.154474 |
| 4                    | 7             | 0           | -1.327077              | 1.556265  | -0.127043 |
| 5                    | 6             | 0           | -1.32531               | 2.907942  | -0.046127 |
| 6                    | 6             | 0           | -0.105277              | 3.628891  | 0.057431  |
| 7                    | 6             | 0           | 2.304369               | 0.756634  | -0.110708 |
| 8                    | 6             | 0           | 2.265731               | -0.643444 | -0.241373 |
| 9                    | 6             | 0           | 1.021597               | -1.354637 | -0.36318  |
| 10                   | 6             | 0           | -0.178258              | -0.571563 | -0.307475 |
| 11                   | 6             | 0           | 0.851821               | -2.753589 | -0.540669 |
| 12                   | 6             | 0           | -0.420216              | -3.295821 | -0.668956 |
| 13                   | 6             | 0           | -1.564883              | -2.464716 | -0.608682 |
| 14                   | 7             | 0           | -1.424905              | -1.13357  | -0.414223 |
| 15                   | 6             | 0           | -2.629588              | 3.635796  | -0.115704 |
| 16                   | 6             | 0           | -2.936438              | -3.028937 | -0.790496 |
| 17                   | 6             | 0           | -3.402489              | 3.852777  | 1.050598  |
| 18                   | 6             | 0           | -4.63506               | 4.516437  | 0.937423  |
| 19                   | 6             | 0           | -5.113271              | 4.99034   | -0.298343 |
| 20                   | 6             | 0           | -4.305773              | 4.804355  | -1.433981 |
| 21                   | 6             | 0           | -3.065907              | 4.142248  | -1.364273 |
| 22                   | 6             | 0           | -3.486519              | -3.099682 | -2.093648 |
| 23                   | 6             | 0           | -4.788158              | -3.607279 | -2.255879 |
| 24                   | 6             | 0           | -5.5526                | -4.057156 | -1.164206 |
| 25                   | 6             | 0           | -4.964332              | -4.016748 | 0.113569  |
| 26                   | 6             | 0           | -3.665713              | -3.521282 | 0.318381  |
| 27                   | 6             | 0           | -2.210552              | 4.017598  | -2.608773 |
| 28                   | 6             | 0           | -6.454368              | 5.682517  | -0.390744 |
| 29                   | 6             | 0           | -2.896095              | 3.435187  | 2.413557  |
| 30                   | 6             | 0           | -3.054683              | -3.572037 | 1.70218   |
| 31                   | 6             | 0           | -2.682257              | -2.68375  | -3.30794  |
| 32                   | 6             | 0           | -6.963762              | -4.566495 | -1.347768 |
| 33                   | 7             | 0           | 3.604182               | 1.215009  | -0.044003 |
| 34                   | 6             | 0           | 4.380434               | 0.120874  | -0.124027 |
| 35                   | 7             | 0           | 3.60763                | -1.042712 | -0.252778 |
| 36                   | 6             | 0           | 5.846254               | 0.200095  | -0.125848 |
| 37                   | 6             | 0           | 6.695578               | -0.745155 | 0.489492  |

|    |   |   |            |           |           |
|----|---|---|------------|-----------|-----------|
| 38 | 6 | 0 | 8.083469   | -0.585202 | 0.476208  |
| 39 | 6 | 0 | 8.673781   | 0.528627  | -0.158971 |
| 40 | 6 | 0 | 7.828669   | 1.489709  | -0.758664 |
| 41 | 6 | 0 | 6.442927   | 1.329383  | -0.732529 |
| 42 | 7 | 0 | 10.088282  | 0.676934  | -0.188442 |
| 43 | 6 | 0 | 10.687848  | 1.963569  | -0.042511 |
| 44 | 6 | 0 | 10.917152  | -0.479045 | -0.330765 |
| 45 | 6 | 0 | 12.072749  | -0.63407  | 0.462886  |
| 46 | 6 | 0 | 12.876394  | -1.770719 | 0.324046  |
| 47 | 6 | 0 | 12.534293  | -2.784211 | -0.593341 |
| 48 | 6 | 0 | 11.368368  | -2.633633 | -1.37128  |
| 49 | 6 | 0 | 10.577849  | -1.48847  | -1.257516 |
| 50 | 6 | 0 | 11.836381  | 2.302744  | -0.790867 |
| 51 | 6 | 0 | 12.442986  | 3.549123  | -0.623531 |
| 52 | 6 | 0 | 11.901789  | 4.501343  | 0.263731  |
| 53 | 6 | 0 | 10.754372  | 4.161754  | 1.008208  |
| 54 | 6 | 0 | 10.158648  | 2.904619  | 0.866651  |
| 55 | 8 | 0 | -9.443139  | -2.190134 | -0.001737 |
| 56 | 8 | 0 | -9.578931  | 2.349301  | 0.853605  |
| 57 | 1 | 0 | -16.332247 | 1.450662  | -0.653167 |
| 58 | 6 | 0 | -12.233628 | -2.307332 | -0.563993 |
| 59 | 6 | 0 | -13.62095  | -2.306721 | -0.839155 |
| 60 | 6 | 0 | -14.353178 | -1.129564 | -0.756543 |
| 61 | 6 | 0 | -13.728059 | 0.098649  | -0.394542 |
| 62 | 6 | 0 | -14.420802 | 1.347119  | -0.29227  |
| 63 | 6 | 0 | -13.76538  | 2.518646  | 0.063763  |
| 64 | 6 | 0 | -12.379202 | 2.495394  | 0.335151  |
| 65 | 6 | 0 | -10.141933 | -1.156042 | 0.079043  |
| 66 | 6 | 0 | -11.591721 | -1.124771 | -0.206092 |
| 67 | 6 | 0 | -12.319405 | 0.097119  | -0.11348  |
| 68 | 6 | 0 | -11.661642 | 1.306311  | 0.250071  |
| 69 | 6 | 0 | -10.215229 | 1.318797  | 0.544468  |
| 70 | 7 | 0 | -9.543377  | 0.070856  | 0.46053   |
| 71 | 6 | 0 | -4.049512  | 0.806214  | -3.162012 |
| 72 | 6 | 0 | -2.146176  | -0.196212 | 3.300838  |
| 73 | 6 | 0 | -3.620327  | -0.18747  | 3.000977  |
| 74 | 7 | 0 | -4.029872  | -0.003094 | 1.729971  |
| 75 | 6 | 0 | -5.37421   | 0.008927  | 1.448834  |
| 76 | 6 | 0 | -6.364439  | -0.168971 | 2.450898  |
| 77 | 6 | 0 | -5.919259  | -0.36236  | 3.784944  |
| 78 | 6 | 0 | -4.560268  | -0.370275 | 4.054424  |
| 79 | 6 | 0 | -5.781434  | 0.216057  | 0.080925  |

|     |    |   |           |           |           |
|-----|----|---|-----------|-----------|-----------|
| 80  | 6  | 0 | -7.161511 | 0.241806  | -0.248456 |
| 81  | 6  | 0 | -8.134602 | 0.049712  | 0.794694  |
| 82  | 6  | 0 | -7.752244 | -0.147304 | 2.092818  |
| 83  | 7  | 0 | -4.796661 | 0.388262  | -0.861143 |
| 84  | 6  | 0 | -5.135915 | 0.601294  | -2.146201 |
| 85  | 6  | 0 | -6.501769 | 0.641376  | -2.541401 |
| 86  | 6  | 0 | -7.505992 | 0.461544  | -1.606777 |
| 87  | 29 | 0 | -2.929962 | 0.251642  | -0.037633 |
| 88  | 6  | 0 | 12.643043 | 5.784456  | 0.4576    |
| 89  | 8  | 0 | 13.872611 | 5.862249  | 0.357434  |
| 90  | 8  | 0 | 11.928624 | 6.916707  | 0.819878  |
| 91  | 6  | 0 | 10.57551  | 7.196606  | 0.338901  |
| 92  | 6  | 0 | 13.284237 | -4.073858 | -0.699637 |
| 93  | 8  | 0 | 12.716473 | -5.14703  | -0.938297 |
| 94  | 8  | 0 | 14.648444 | -4.077489 | -0.471249 |
| 95  | 6  | 0 | 15.526386 | -2.952558 | -0.800937 |
| 96  | 6  | 0 | 5.069459  | -7.957736 | 2.679435  |
| 97  | 6  | 0 | 5.096498  | -7.050878 | 1.438688  |
| 98  | 6  | 0 | 4.575417  | -5.631106 | 1.725828  |
| 99  | 6  | 0 | 4.599501  | -4.718039 | 0.487054  |
| 100 | 6  | 0 | 4.075504  | -3.300536 | 0.779883  |
| 101 | 6  | 0 | 4.121087  | -2.405117 | -0.471136 |
| 102 | 1  | 0 | 2.056387  | 3.479926  | 0.137317  |
| 103 | 1  | 0 | -0.146622 | 4.710039  | 0.135671  |
| 104 | 1  | 0 | 1.706424  | -3.415203 | -0.587087 |
| 105 | 1  | 0 | -0.554598 | -4.361725 | -0.818906 |
| 106 | 1  | 0 | -5.233998 | 4.671703  | 1.833139  |
| 107 | 1  | 0 | -4.643622 | 5.188565  | -2.394689 |
| 108 | 1  | 0 | -5.212151 | -3.658028 | -3.256992 |
| 109 | 1  | 0 | -5.529523 | -4.383298 | 0.968777  |
| 110 | 1  | 0 | -1.346775 | 4.694353  | -2.564317 |
| 111 | 1  | 0 | -1.81478  | 3.004228  | -2.740289 |
| 112 | 1  | 0 | -2.781449 | 4.28021   | -3.50534  |
| 113 | 1  | 0 | -7.268633 | 5.001456  | -0.111586 |
| 114 | 1  | 0 | -6.504419 | 6.54275   | 0.28839   |
| 115 | 1  | 0 | -6.651351 | 6.045218  | -1.404735 |
| 116 | 1  | 0 | -2.409574 | 2.456722  | 2.381947  |
| 117 | 1  | 0 | -2.157717 | 4.155805  | 2.792033  |
| 118 | 1  | 0 | -3.713326 | 3.390433  | 3.140778  |
| 119 | 1  | 0 | -3.830581 | -3.607628 | 2.474004  |
| 120 | 1  | 0 | -2.434276 | -4.471378 | 1.821432  |
| 121 | 1  | 0 | -2.41398  | -2.707645 | 1.898441  |

|     |   |   |            |           |           |
|-----|---|---|------------|-----------|-----------|
| 122 | 1 | 0 | -2.213521  | -1.702309 | -3.176057 |
| 123 | 1 | 0 | -1.874791  | -3.400476 | -3.510426 |
| 124 | 1 | 0 | -3.312903  | -2.644528 | -4.201902 |
| 125 | 1 | 0 | -7.693151  | -3.866124 | -0.921587 |
| 126 | 1 | 0 | -7.206285  | -4.702075 | -2.407017 |
| 127 | 1 | 0 | -7.105524  | -5.531011 | -0.844825 |
| 128 | 1 | 0 | 6.282265   | -1.58707  | 1.034739  |
| 129 | 1 | 0 | 8.713472   | -1.315072 | 0.974438  |
| 130 | 1 | 0 | 8.262845   | 2.352625  | -1.253612 |
| 131 | 1 | 0 | 5.800029   | 2.07222   | -1.194004 |
| 132 | 1 | 0 | 12.329956  | 0.126179  | 1.19373   |
| 133 | 1 | 0 | 13.742067  | -1.886457 | 0.969069  |
| 134 | 1 | 0 | 11.096155  | -3.424947 | -2.063445 |
| 135 | 1 | 0 | 9.695889   | -1.37116  | -1.87952  |
| 136 | 1 | 0 | 12.250126  | 1.587105  | -1.49424  |
| 137 | 1 | 0 | 13.342317  | 3.802075  | -1.17729  |
| 138 | 1 | 0 | 10.353051  | 4.85762   | 1.738901  |
| 139 | 1 | 0 | 9.29667    | 2.642828  | 1.472307  |
| 140 | 1 | 0 | -11.650537 | -3.22125  | -0.624504 |
| 141 | 1 | 0 | -14.114388 | -3.2329   | -1.115633 |
| 142 | 1 | 0 | -15.41753  | -1.136617 | -0.969067 |
| 143 | 1 | 0 | -14.313545 | 3.451552  | 0.135092  |
| 144 | 1 | 0 | -11.857765 | 3.405472  | 0.615258  |
| 145 | 1 | 0 | -3.067306  | 0.701524  | -2.695392 |
| 146 | 1 | 0 | -4.136011  | 0.079705  | -3.978152 |
| 147 | 1 | 0 | -4.121661  | 1.80726   | -3.603055 |
| 148 | 1 | 0 | -1.565778  | -0.070542 | 2.384689  |
| 149 | 1 | 0 | -1.884631  | 0.611911  | 3.99521   |
| 150 | 1 | 0 | -1.850701  | -1.137699 | 3.779953  |
| 151 | 1 | 0 | -6.644663  | -0.500846 | 4.581886  |
| 152 | 1 | 0 | -4.193898  | -0.514044 | 5.065882  |
| 153 | 1 | 0 | -8.503034  | -0.286618 | 2.86526   |
| 154 | 1 | 0 | -6.739889  | 0.815608  | -3.585757 |
| 155 | 1 | 0 | -8.54907   | 0.490061  | -1.904191 |
| 156 | 1 | 0 | 10.609342  | 8.19653   | -0.100318 |
| 157 | 1 | 0 | 10.247204  | 6.470266  | -0.411583 |
| 158 | 1 | 0 | 9.88688    | 7.193351  | 1.188989  |
| 159 | 1 | 0 | 16.345682  | -3.372809 | -1.388405 |
| 160 | 1 | 0 | 15.007525  | -2.18249  | -1.380436 |
| 161 | 1 | 0 | 15.921975  | -2.523522 | 0.1241    |
| 162 | 1 | 0 | 5.445928   | -8.960735 | 2.446378  |
| 163 | 1 | 0 | 5.693148   | -7.546062 | 3.483371  |

|     |   |   |          |           |           |
|-----|---|---|----------|-----------|-----------|
| 164 | 1 | 0 | 4.048828 | -8.065521 | 3.069548  |
| 165 | 1 | 0 | 4.492545 | -7.504975 | 0.6388    |
| 166 | 1 | 0 | 6.124523 | -6.98895  | 1.052724  |
| 167 | 1 | 0 | 5.181677 | -5.17828  | 2.525242  |
| 168 | 1 | 0 | 3.547251 | -5.693927 | 2.115374  |
| 169 | 1 | 0 | 3.997997 | -5.178406 | -0.313094 |
| 170 | 1 | 0 | 5.628626 | -4.658425 | 0.101303  |
| 171 | 1 | 0 | 4.672948 | -2.843342 | 1.57999   |
| 172 | 1 | 0 | 3.050311 | -3.357649 | 1.170171  |
| 173 | 1 | 0 | 3.555356 | -2.858841 | -1.293262 |
| 174 | 1 | 0 | 5.151329 | -2.313833 | -0.826398 |



## Cu(I)-A-H

| Standard Orientation |               |             |                         |           |           |
|----------------------|---------------|-------------|-------------------------|-----------|-----------|
| Center Number        | Atomic Number | Atomic Type | Coordinates (Angstroms) |           |           |
|                      |               |             | X                       | Y         | Z         |
| 1                    | 6             | 0           | -4.744046               | -4.107053 | -1.169935 |
| 2                    | 6             | 0           | -5.212252               | -2.787905 | -1.405952 |
| 3                    | 6             | 0           | -4.394145               | -1.715152 | -0.956556 |
| 4                    | 7             | 0           | -3.19595                | -1.919475 | -0.319555 |
| 5                    | 6             | 0           | -2.762701               | -3.180718 | -0.093873 |
| 6                    | 6             | 0           | -3.532678               | -4.298414 | -0.520425 |
| 7                    | 6             | 0           | -6.458227               | -2.505786 | -2.067256 |
| 8                    | 6             | 0           | -6.870509               | -1.211994 | -2.261773 |
| 9                    | 6             | 0           | -6.069299               | -0.106107 | -1.808213 |
| 10                   | 6             | 0           | -4.826582               | -0.350814 | -1.161972 |
| 11                   | 6             | 0           | -6.46458                | 1.246786  | -1.97233  |
| 12                   | 6             | 0           | -5.656827               | 2.25742   | -1.473541 |
| 13                   | 6             | 0           | -4.430903               | 1.946126  | -0.820403 |
| 14                   | 7             | 0           | -4.017205               | 0.662346  | -0.699228 |
| 15                   | 6             | 0           | -1.466527               | -3.379375 | 0.620637  |
| 16                   | 6             | 0           | -3.624235               | 3.050462  | -0.217366 |
| 17                   | 6             | 0           | -0.29705                | -3.707722 | -0.108133 |
| 18                   | 6             | 0           | 0.915871                | -3.856506 | 0.584624  |
| 19                   | 6             | 0           | 0.995393                | -3.719885 | 1.982911  |
| 20                   | 6             | 0           | -0.188604               | -3.436454 | 2.687116  |
| 21                   | 6             | 0           | -1.421111               | -3.267117 | 2.03141   |
| 22                   | 6             | 0           | -2.487371               | 3.570084  | -0.884007 |
| 23                   | 6             | 0           | -1.773092               | 4.623367  | -0.291157 |
| 24                   | 6             | 0           | -2.162219               | 5.186208  | 0.938928  |
| 25                   | 6             | 0           | -3.30862                | 4.671188  | 1.567739  |
| 26                   | 6             | 0           | -4.056608               | 3.619557  | 1.005841  |
| 27                   | 6             | 0           | -2.678446               | -3.019576 | 2.837334  |
| 28                   | 6             | 0           | 2.317419                | -3.890598 | 2.694901  |
| 29                   | 6             | 0           | -0.331189               | -3.928277 | -1.6061   |
| 30                   | 6             | 0           | -5.313404               | 3.143655  | 1.707278  |
| 31                   | 6             | 0           | -2.061369               | 3.032934  | -2.231735 |
| 32                   | 6             | 0           | -1.381074               | 6.329626  | 1.545998  |
| 33                   | 8             | 0           | 4.527478                | -1.841636 | 0.652284  |
| 34                   | 8             | 0           | 4.24184                 | 2.614842  | -0.543895 |
| 35                   | 6             | 0           | 7.311055                | -1.974147 | 0.006674  |
| 36                   | 6             | 0           | 8.686668                | -1.980344 | -0.32975  |
| 37                   | 6             | 0           | 9.295437                | -0.824848 | -0.803962 |

|    |    |   |           |           |           |
|----|----|---|-----------|-----------|-----------|
| 38 | 6  | 0 | 8.55118   | 0.381047  | -0.960206 |
| 39 | 6  | 0 | 9.144124  | 1.583813  | -1.444501 |
| 40 | 6  | 0 | 8.389941  | 2.742156  | -1.585917 |
| 41 | 6  | 0 | 7.014397  | 2.742347  | -1.248833 |
| 42 | 6  | 0 | 5.125596  | -0.827744 | 0.227724  |
| 43 | 6  | 0 | 6.556713  | -0.810832 | -0.134146 |
| 44 | 6  | 0 | 7.16074   | 0.384429  | -0.619    |
| 45 | 6  | 0 | 6.406607  | 1.582574  | -0.771897 |
| 46 | 6  | 0 | 4.972368  | 1.607837  | -0.424504 |
| 47 | 7  | 0 | 4.420737  | 0.393876  | 0.07132   |
| 48 | 6  | 0 | -1.208303 | -0.52653  | -3.29998  |
| 49 | 6  | 0 | -2.860031 | 0.737244  | 3.186524  |
| 50 | 6  | 0 | -1.399716 | 0.710918  | 2.837025  |
| 51 | 7  | 0 | -1.037609 | 0.432221  | 1.569479  |
| 52 | 6  | 0 | 0.293232  | 0.439149  | 1.228932  |
| 53 | 6  | 0 | 1.318664  | 0.706419  | 2.172476  |
| 54 | 6  | 0 | 0.924949  | 0.987187  | 3.507123  |
| 55 | 6  | 0 | -0.421348 | 0.994079  | 3.831283  |
| 56 | 6  | 0 | 0.648093  | 0.170148  | -0.142987 |
| 57 | 6  | 0 | 2.014527  | 0.156311  | -0.528977 |
| 58 | 6  | 0 | 3.026784  | 0.414703  | 0.461346  |
| 59 | 6  | 0 | 2.691076  | 0.684406  | 1.759222  |
| 60 | 7  | 0 | -0.371383 | -0.056995 | -1.03553  |
| 61 | 6  | 0 | -0.08188  | -0.303483 | -2.327883 |
| 62 | 6  | 0 | 1.266979  | -0.338294 | -2.778192 |
| 63 | 6  | 0 | 2.305448  | -0.111745 | -1.891053 |
| 64 | 29 | 0 | -2.207704 | -0.111455 | -0.0181   |
| 65 | 1  | 0 | -5.339341 | -4.956095 | -1.495063 |
| 66 | 1  | 0 | -3.15624  | -5.295383 | -0.318619 |
| 67 | 1  | 0 | -7.068683 | -3.337848 | -2.407896 |
| 68 | 1  | 0 | -7.813647 | -1.001394 | -2.75897  |
| 69 | 1  | 0 | -7.399353 | 1.479221  | -2.475332 |
| 70 | 1  | 0 | -5.939392 | 3.300042  | -1.571187 |
| 71 | 1  | 0 | 1.821003  | -4.081171 | 0.023979  |
| 72 | 1  | 0 | -0.154161 | -3.351765 | 3.771634  |
| 73 | 1  | 0 | -0.897503 | 5.01809   | -0.803148 |
| 74 | 1  | 0 | -3.637185 | 5.103989  | 2.510823  |
| 75 | 1  | 0 | -3.233265 | -2.149507 | 2.470477  |
| 76 | 1  | 0 | -3.357638 | -3.881362 | 2.784119  |
| 77 | 1  | 0 | -2.440889 | -2.855482 | 3.89317   |
| 78 | 1  | 0 | 2.639854  | -4.9403   | 2.674085  |
| 79 | 1  | 0 | 3.101645  | -3.297656 | 2.211029  |

|     |   |   |           |           |           |
|-----|---|---|-----------|-----------|-----------|
| 80  | 1 | 0 | 2.250604  | -3.587929 | 3.74529   |
| 81  | 1 | 0 | -0.661973 | -4.948272 | -1.846111 |
| 82  | 1 | 0 | -1.017356 | -3.240728 | -2.110563 |
| 83  | 1 | 0 | 0.664882  | -3.800209 | -2.041928 |
| 84  | 1 | 0 | -6.21596  | 3.509093  | 1.199615  |
| 85  | 1 | 0 | -5.38514  | 2.050543  | 1.739466  |
| 86  | 1 | 0 | -5.350593 | 3.515787  | 2.736203  |
| 87  | 1 | 0 | -1.828894 | 1.965232  | -2.172698 |
| 88  | 1 | 0 | -2.855277 | 3.157979  | -2.980328 |
| 89  | 1 | 0 | -1.17199  | 3.554559  | -2.598234 |
| 90  | 1 | 0 | -0.306836 | 6.110377  | 1.570248  |
| 91  | 1 | 0 | -1.510411 | 7.248462  | 0.959104  |
| 92  | 1 | 0 | -1.706703 | 6.542529  | 2.569255  |
| 93  | 1 | 0 | 6.824134  | -2.870227 | 0.379759  |
| 94  | 1 | 0 | 9.26303   | -2.892694 | -0.213942 |
| 95  | 1 | 0 | 10.351641 | -0.829413 | -1.061529 |
| 96  | 1 | 0 | 10.200093 | 1.583786  | -1.703065 |
| 97  | 1 | 0 | 8.851786  | 3.652463  | -1.954717 |
| 98  | 1 | 0 | 6.413632  | 3.64089   | -1.354002 |
| 99  | 1 | 0 | -2.163782 | -0.588528 | -2.775055 |
| 100 | 1 | 0 | -1.263273 | 0.295627  | -4.024984 |
| 101 | 1 | 0 | -1.056557 | -1.449049 | -3.872488 |
| 102 | 1 | 0 | -3.460698 | 0.390165  | 2.342453  |
| 103 | 1 | 0 | -3.069328 | 0.108894  | 4.059828  |
| 104 | 1 | 0 | -3.171875 | 1.759504  | 3.432023  |
| 105 | 1 | 0 | 1.679344  | 1.197018  | 4.260275  |
| 106 | 1 | 0 | -0.749856 | 1.213493  | 4.842028  |
| 107 | 1 | 0 | 3.46914   | 0.884526  | 2.490223  |
| 108 | 1 | 0 | 1.465892  | -0.539195 | -3.826039 |
| 109 | 1 | 0 | 3.335967  | -0.13388  | -2.229983 |

## References

1. M. J. Frisch, G. W. Trucks, H. B. Schlegel, G. E. Scuseria, M. A. Robb, J. R. Cheeseman, G. Scalmani, V. Barone, G. A. Petersson, H. Nakatsuji, X. Li, M. Caricato, A. V. Marenich, J. Bloino, B. G. Janesko, R. Gomperts, B. Mennucci, H. P. Hratchian, J. V. Ortiz, A. F. Izmaylov, J. L. Sonnenberg, Williams, F. Ding, F. Lipparini, F. Egidi, J. Goings, B. Peng, A. Petrone, T. Henderson, D. Ranasinghe, V. G. Zakrzewski, J. Gao, N. Rega, G. Zheng, W. Liang, M. Hada, M. Ehara, K. Toyota, R. Fukuda, J. Hasegawa, M. Ishida, T. Nakajima, Y. Honda, O. Kitao, H. Nakai, T. Vreven, K. Throssell, J. A. Montgomery Jr., J. E. Peralta, F. Ogliaro, M. J. Bearpark, J. J. Heyd, E. N. Brothers, K. N. Kudin, V. N. Staroverov, T. A. Keith, R. Kobayashi, J. Normand, K. Raghavachari, A. P. Rendell, J. C. Burant, S. S. Iyengar, J. Tomasi, M. Cossi, J. M. Millam, M. Klene, C. Adamo, R. Cammi, J. W. Ochterski, R. L. Martin, K. Morokuma, O. Farkas, J. B. Foresman and D. J. Fox, *Journal*, 2016.
2. Y. Zhao, J. Pu, B. J. Lynch and D. G. Truhlar, *Phys. Chem. Chem. Phys.*, 2004, **6**, 673.
3. S. Chiodo, N. Russo and E. Sicilia, *J. Chem. Phys.*, 2006, **125**.
4. R. Dennington, T. A. Keith and J. M. Millam, *GuassView Version 5.0.8*, 2009, Semichem Inc. Shawnee Mission KS.
5. Y. Pellegrin, M. Sandroni, E. Blart, A. Planchat, M. Evain, N. C. Bera, M. Kayanuma, M. Sliwa, M. Rebarz, O. Poizat, C. Daniel and F. Odobel, *Inorg. Chem.*, 2011, **50**, 11309-11322.
6. J. Frey, T. Kraus, V. Heitz and J.-P. Sauvage, *Chem. Eur. J*, 2007, **13**, 7584-7594.
7. M. Sandroni, M. Kayanuma, A. Planchat, N. Szuwarski, E. Blart, Y. Pellegrin, C. Daniel, M. Boujtita and F. Odobel, *Dalton Trans.*, 2013, **42**, 10818-10827.
8. Z. Singh, P. R. Donnarumma and M. B. Majewski, *Inorg. Chem.*, 2020, **59**, 12994-12999.
